1 **Title: Predictive feedback, early sensory representations and fast responses to**  
2 **predicted stimuli depend on NMDA receptors**

3 **Authors:** Sounak Mohanta<sup>1</sup>, Mohsen Afrasiabi<sup>1</sup>, Cameron Casey<sup>2</sup>, Sean Tanabe<sup>2</sup>,  
4 Michelle J. Redinbaugh<sup>1</sup>, Niranjan A. Kambi<sup>1</sup>, Jessica M. Phillips<sup>1</sup>, Daniel Polyakov<sup>2</sup>,  
5 William Filbey<sup>2</sup>, Joseph L. Austerweil<sup>1</sup>, Robert D. Sanders<sup>2\*</sup>†, Yuri B. Saalman<sup>1\*</sup>†

6 **Affiliations:**

7 <sup>1</sup> Department of Psychology, University of Wisconsin - Madison

8 <sup>2</sup> Department of Anesthesiology, University of Wisconsin - Madison

9 \*Correspondence to: [saalman@wisc.edu](mailto:saalman@wisc.edu) or [robert.sanders@sydney.edu.au](mailto:robert.sanders@sydney.edu.au)

10 † Authors contributed equally

11

12 **Author contributions:**

13 S.M., M.R., N.K., J.P., R.S. and Y.S. designed study; S.M., C.C., S.T., D.P., W.F., R.S., and

14 Y.S. performed research; S.M., M.A., C.C., S.T., J.A., R.S. and Y.S. analyzed data; S.M., M.A.,

15 R.S. and Y.S. wrote paper; S.M., M.A., C.C., S.T., M.R., N.K., J.P., D.P., W.F., J.A., R.S., and

16 Y.S. edited paper.

17 **Declaration of interests:**

18 Authors declare no competing interests.

19 **This PDF file includes:**

20 Main text

21 Main figure captions

22 Supplemental figure captions

23 Supplemental table

24

25

1    **Abstract:** Learned associations between stimuli allow us to model the world and make  
2    predictions, crucial for efficient behavior; e.g., hearing a siren, we expect to see an ambulance  
3    and quickly make way. While there are theoretical and computational frameworks for prediction,  
4    the circuit and receptor-level mechanisms are unclear. Using high-density EEG, Bayesian  
5    modeling and machine learning, we show that inferred “causal” relationships between stimuli  
6    and frontal alpha activity account for reaction times (a proxy for predictions) on a trial-by-trial  
7    basis in an audio-visual delayed match-to-sample task which elicited predictions. Predictive beta  
8    feedback activated sensory representations in advance of predicted stimuli. Low-dose ketamine,  
9    a NMDA receptor blocker – but not the control drug dexmedetomidine – perturbed behavioral  
10   indices of predictions, their representation in higher-order cortex, feedback to posterior cortex  
11   and pre-activation of sensory templates in higher-order sensory cortex. This study suggests  
12   predictions depend on alpha activity in higher-order cortex, beta feedback and NMDA receptors,  
13   and ketamine blocks access to learned predictive information.

14

1 **Main text**

2 **Introduction**

3 The classical view of sensory processing focuses on feedforward information transmission from  
4 the sensory organs to higher-order cortex, to generate representations of the world [1,2].

5 However, growing evidence of expectations strongly influencing perception and behavior [3–5]

6 suggests that the brain actively predicts incoming sensory information, a process that is not

7 featured in the traditional framework. Predictive coding (PC) takes this process into account,

8 wherein the brain uses generative models to make inferences about the world [6–10], possibly

9 even to support conscious experience [11–13]. PC proposes that these models, based on prior

10 sensory experiences, are represented at higher-order levels of a cortical hierarchy. The model

11 predictions are transmitted from higher-order to lower-order cortex along feedback connections.

12 Any mismatch between feedback predictions and observed sensory evidence generates an

13 error signal, which is transmitted along feedforward connections, to update models in higher-

14 order cortex [14–16]. The updated model is used in the next iteration to generate new

15 predictions. This process of Bayesian updating aims to optimize beliefs about the sensory world.

16 However, the neural representation of predictions is unclear.

17

18 N-methyl-D-aspartate receptors (NMDARs) may play a key role in PC. Theoretical work on PC

19 [17] has proposed that higher levels of a cortical hierarchy transmit top-down predictions to

20 lower levels through NMDAR-mediated signaling. Consistent with this proposal, NMDARs have

21 been shown to modulate higher-order (frontal) cortical excitability [18–21], be enriched in

22 superficial and deep cortical layers where feedback connections terminate [22], and contribute

23 to feedback activity [23]. However, there is a lack of experimental evidence linking NMDARs

24 and prediction itself. Ketamine, a NMDAR blocker [24], can reduce prediction error signals,

25 measured as auditory mismatch negativity (MMN) in oddball paradigms [25–27]. But because

26 the MMN reflects the mismatch between predictions and observed sensory evidence, it is

1 difficult to dissect if ketamine's effect on the MMN is due to ketamine influencing feedback  
2 predictions, feedforward sensory evidence or error signaling directly, any of which can reduce  
3 the MMN. Further, prediction is only assumed in oddball paradigms; there is no behavioral  
4 measure of prediction. Hence, a paradigm that incorporates a behavioral readout of predictions  
5 and separates predictions from other PC mechanisms is required to probe a contribution of  
6 NMDARs to predictions and their neural representation.

7

8 To test circuit and receptor-level mechanisms of prediction, we recorded 256-channel EEG of  
9 subjects performing an audio-visual delayed match-to-sample task (Fig 1A). The task design  
10 temporally separates predictions (generated during the delay period) from error processing  
11 (after image onset), which cannot be done in oddball paradigms [25–27]. Furthermore, having  
12 auditory stimuli carry predictive information about visual stimuli allows us to modulate separate  
13 feedforward (auditory to frontal) and feedback (frontal to visual) pathways. Subjects performed  
14 the task before, during, and after recovery from sub-hypnotic dosing of ketamine, targeted to  
15 concentrations that modulate NMDARs. In control experiments, we instead administered sub-  
16 hypnotic dexmedetomidine (DEX), an  $\alpha_2$  adrenergic receptor agonist, selected to account for  
17 changes in arousal and modulation of hyperpolarization-activated cyclic nucleotide channels  
18 (HCN-1, which mediate ketamine's anesthetic effects [28]). We found that subjects responded  
19 most quickly to highly predictive sounds, reaction times (RTs) thus serving as a behavioral  
20 readout of predictions. Drift diffusion modeling [29], which links decision-making processes to  
21 RTs, demonstrated that both inferred "causal" relationships between stimuli and frontal alpha  
22 power predicted RTs on a trial-by-trial basis – here causal used in a statistical sense, i.e.,  
23 subjects tracked how often each image was preceded by its paired as well as unpaired sounds  
24 – and these relationships were notably absent under ketamine. Frontal alpha power contributed  
25 most to accuracy when classifying predictive stimuli using a support vector machine, consistent  
26 with the proposal that predictions increase the signal-to-noise ratio (SNR) in frontal cortex.

1 Moreover, frontal cortex transmitted predictions to posterior cortex using beta frequencies,  
2 measured as Granger causal influence, activating sensory representations of predicted images  
3 before their presentation. Because ketamine, but not DEX, blocked these neural representations  
4 of predictions and their behavioral advantage, this study suggests a key role for frontal and  
5 posterior alpha activity, beta-mediated feedback and NMDARs in prediction mechanisms, as  
6 postulated in PC frameworks.

7

## 8 **Results**

9 ***Predictions improved RTs.*** Subjects initially learned paired associations (A1-V1, A2-V2, A3-  
10 V3) between three sounds (A1, A2, A3) and three images (V1, V2, V3) through trial-and-error.  
11 During learning, each sound and image had equal probability (33%) of appearing in any given  
12 trial, preventing subjects developing any differential predictions due to stimulus frequency. Thus,  
13 the presence of any given sound does not predict the occurrence of any future image, during  
14 this learning phase. Following the presentation of both stimuli, subjects reported if the sound  
15 and image were in fact paired, i.e., whether or not they matched. To manipulate subjects'  
16 predictions during subsequent testing, we varied the probability of an image appearing after its  
17 associated sound. This probability was different for each sound: 85% chance of V1 after A1;  
18 50% chance of V2 after A2; and 33% chance of V3 after A3 (Fig 1A). Thus, A1 was highly  
19 predictive (HP), A2 was moderately predictive (MP), and A3 was not match predictive (NP).

20 **Fig 1. Ketamine blocked fast RTs to predictive sounds. See also Fig S1 and S2.** (A) We  
21 manipulated subjects' predictions by changing the probability of an image appearing after its  
22 associated sound in an audio-visual delayed match-to-sample task (after the initial learning  
23 phase). Population RT (+SE) of 15 subjects (B) before (Pre), (C) under (Keta), and (D) after  
24 recovery (Reco) from ketamine. (E) Population RT (+SE) of 14 subjects under dexmedetomidine  
25 (DEX). RTs from correct match trials. (F) Population causal power (CP) values across time for

1 pre-ketamine (Pre) testing. Each data point corresponds to the CP at a particular trial for an  
2 individual subject. The data points form a trajectory of CP across trials. Data from 15 subjects  
3 overlaid. (G) HDDM of RTs. Bias ( $z$ ) calculated for each trial ( $t$ ) using CP.  $\beta_1$  determines the  
4 relationship between  $z$  and CP. (H) Posterior probability density of  $\beta_1$  for different drug conditions.

5  
6

7 We hypothesized that increasing the predictive value of the sound would allow subjects to better  
8 predict the upcoming image, enabling quicker responses (HP<MP<NP) in match trials.

9 However, if predictions are mediated by NMDARs, then ketamine should disrupt predictions;  
10 i.e., subjects administered with a sub-anesthetic dose of ketamine should be unable to exploit  
11 the differential predictive value of each sound, thus preventing faster RTs. If these effects are  
12 specific to NMDAR manipulation, then the control drug DEX should still allow faster RTs to  
13 predicted stimuli. To investigate these hypotheses (and to restrict multiple tests on the same  
14 dataset), we ran a linear mixed effects (LME) model. We used the sounds' predictive value (HP,  
15 MP, NP) and drug condition (before drug, under ketamine, under DEX, after recovery from drug)  
16 as independent variables and RT as our dependent variable (RT~ sounds' predictive value +  
17 drug condition + sounds' predictive value x drug condition). We applied a contrast analysis  
18 strategy to model our independent variables. Our study conformed to the guidelines set out by  
19 Abelson and Prentice [30] with regards to contrast analysis; i.e., we included the contrast of  
20 interest along with paired, orthogonal contrasts. (Contrasts of interest only explain a part of the  
21 total variation between groups. We included orthogonal contrasts to explain the residual  
22 variance. According to Abelson and Prentice [30], an analysis of the residual variance, i.e.,  
23 orthogonal contrasts, is important since one may miss systematic patterns in the data if one only  
24 tests the contrast of interest. They suggested that finding a significant contrast of interest and a  
25 non-significant orthogonal contrast confirms the data support the hypothesis.)

1 To test our hypothesis that a greater predictive value of sounds allows subjects to respond  
2 faster, we used a linear contrast (HP, MP, NP: -1, 0, 1) as our contrast of interest, and a  
3 quadratic contrast (HP, MP, NP: -1, 2, -1) as the orthogonal contrast in the analysis. Further, to  
4 test our hypothesis that only ketamine prevents these faster responses, we used a four-level  
5 contrast (under ketamine, before drug, under DEX, after recovery: 3, -1, -1, -1) as our contrast  
6 of interest, and two orthogonal contrasts (under ketamine, before drug, under DEX, after  
7 recovery: 0, 0, -1, -1 and 0, 2, -1, -1) in the analysis. A significant main effect of prediction will  
8 confirm predictive sounds produce faster responses. A significant interaction effect of prediction  
9 and drug condition will confirm that ketamine disrupts subjects' ability to exploit predictive  
10 sounds to respond faster.

11

12

13 We found a significant main effect of sounds' predictive value in our LME model (ANOVA,  $F(1,$   
14  $21.07)=14.14$ ,  $P=0.001$ ; orthogonal contrasts non-significant). RTs were faster when sounds  
15 had greater predictive value (Fig 1B). This result was further validated in parallel psychophysics  
16 experiments, where we controlled for possible match bias [31] using randomly interleaved  
17 "inversion trials" (in which subjects simply indicated whether greebles were inverted) to minimize  
18 the expectation of match trials (ANOVA,  $F(1, 21.92)=18.71$ ,  $P=0.0001$ , orthogonal contrasts  
19 non-significant, Fig S1A). Furthermore, we found effects on RTs could not be explained by  
20 speed-accuracy trade-offs, as subjects were most accurate for HP, followed by MP and NP  
21 sounds (ANOVA,  $F(1, 21.66)=14.42$ ,  $P=0.001$ , orthogonal contrasts non-significant, Fig S1B).

22

23 ***Ketamine blocked fast RTs to predictive sounds.*** Importantly, we found a significant  
24 interaction of sounds' predictive value and drug condition (ANOVA,  $F(1,16.42)=5.51$ ,  $P=0.03$ ).  
25 The interaction effect confirmed that, under ketamine, the linear correlation between the

1 predictive value of sounds and RT was diminished (Fig 1C). This effect was specific to NMDAR  
2 manipulation, as DEX did not disrupt the ability of subjects to exploit the differential predictive  
3 value of the sounds. Under DEX, the linear correlation between the predictive value of sounds  
4 and RT was intact (Fig 1E), similar to the pre-drug baseline condition. These pharmacological  
5 effects were not due to low accuracy as subjects' average accuracy was similar across all three  
6 conditions (77.8% under ketamine, 85.7% without ketamine, and 81.0% under DEX; ANOVA,  
7  $F(1, 23.932)=1.36, P=0.22$  ). Neither were effects due to the level of sedation as subjects were  
8 more alert under ketamine than dexmedetomidine (under ketamine, average modified  
9 observer's assessment of alertness/sedation (OAA/S) score of 4.85 compared to 3.33 under  
10 DEX (5, awake – 1, unresponsive); unpaired t-test,  $P=0.003$ ). Significant interaction effects in  
11 our LME model also confirmed that the linear correlation of RTs with predictive strength returns  
12 after recovery from ketamine (2-4 hours after ending ketamine administration, depending upon  
13 subject's recovery; Fig 1D). Overall, our results demonstrate that subjects used predictive  
14 information to enhance behavioral performance and the NMDAR-blocker ketamine prevented  
15 this behavioral advantage.

16

17 ***Subjects based predictions on inferred “causal” relationships between stimuli.*** We next  
18 investigated what information in the trial history subjects base predictions on; in other words,  
19 how do subjects learn the predictive relationship between stimuli. We tested two possibilities: (i)  
20 did subjects generate predictions by keeping track of simple co-occurrences of each sound-  
21 image pair, i.e., were they basing predictions on correlations; or (ii) did subjects not only track  
22 the occurrence of each image with its paired sound but also unpaired sounds, i.e., were they  
23 basing predictions on “causation”. Here, the term causation is used in a statistical sense, where  
24 subjects can infer a causal relationship between the initial sound and the image that closely  
25 follows in time. To clarify the difference between correlation versus causation in this context, let  
26 us consider a hypothetical example (adapted from [32]) in which you would like to test whether



1 your new automatic sprinkler system worked overnight. In the morning, you walk outside and  
2 see that the grass is wet. Hence, you might think that the sprinkler operated overnight. In this  
3 case, your inference is based on the correlation of two events. However, after learning from the  
4 weather report that it rained last night, you lose confidence that your sprinkler watered the lawn,  
5 i.e., the wet grass may be due to the rain instead. Here, the presence of one cause (rain) casts  
6 doubt on the other (sprinkler) and thus helps us develop a more appropriate cause-effect  
7 relationship between events (unlike simple correlation). To relate this back to our task, when  
8 subjects track the occurrence of each image with its paired sound but also unpaired sounds, it is  
9 similar to checking the weather report to deduce if the sprinkler worked properly. Inferring a  
10 cause-effect structure between stimuli helps subjects eliminate weak/conditional relations  
11 between particular sounds and images. To measure correlation (option i above), we calculated  
12 the transitional probability, i.e., how often a particular image follows the sound only. To measure  
13 causation (option ii), we calculated the causal power [33] of the sound-image association, which  
14 is the amount of evidence that a sound “causes” a particular image, as opposed to a random  
15 different cause (Table S1 and methods show calculation details; we also calculated two other  
16 measures of “causation” –  $\Delta P$  and causal support – and observed similar results). We updated  
17 the transitional probability and causal power estimates each trial, to account for the additional  
18 information available, i.e., the transitional probability/causal power value was the same for each  
19 stimulus at the start of the pre-drug baseline, but these values eventually systematically differed  
20 between stimuli as more trials were performed, reflecting the accumulating information from the  
21 trial history (Fig 1F, Fig S1E-F shows the causal power differentiating all stimuli earlier than  
22 transitional probability).

23 We next determined whether transitional probability and/or causal power can account for the  
24 behavioral results (RTs). To this end, we modeled subjects’ decision-making process using a  
25 drift-diffusion model (DDM). Evidence accumulates (drift process) from a starting point to one of

1 two boundaries. Here, the boundaries represent the two possible outcomes for match trials only  
2 (correct and incorrect). The drift process stops when it reaches a boundary, indicating the  
3 choice, and the time taken to reach the boundary represents the RT for the trial (Fig 1G). The  
4 starting point of the drift process – here modeled from image onset – may be biased towards  
5 one of the boundaries, and it is determined by a bias parameter,  $z$ . This parameter represents  
6 the predictive value of the sound, which can be based on the transitional probability or causal  
7 power. A drift process that starts with a larger bias will reach the decision boundary quicker,  
8 resulting in a faster RT, i.e., more predictive sounds generate a larger bias and faster RT. Thus,  
9 whichever of transitional probability or causal power (through the bias parameter,  $z$ ) yield better  
10 correspondence with subjects' RTs will be the better indicator of the information subjects used  
11 to generate predictions.

12 To test this, we used hierarchical Bayesian parameter estimation (HDDM) [29], which calculates  
13 the posterior probability density of the diffusion parameters generating the RTs for the entire  
14 group of subjects simultaneously, while allowing for individual differences. We estimated the  
15 regression coefficients to determine the relationship between trial-to-trial transitional  
16 probability/causal power and biases estimated from the posterior predictive distribution. In other  
17 words, we calculated the bias for each trial that best predicted the RT. But, for each trial, the  
18 bias was constrained to depend on the transitional probability or causal power (equation, Fig  
19 1G). Hence, for each trial we calculated the relationship (regression coefficient  $\beta_1$ ) between the  
20 bias and transitional probability/causal power that best predicted RT. Specifically, we estimated  
21 the posterior probability density of the regression coefficient ( $\beta_1$ ; Fig 1G) to determine the  
22 relationship between the bias and either transitional probability or causal power. We found  
23 causal power (deviance information criterion, DIC=-3197) predicted RTs better than transitional  
24 probabilities (DIC=-1795), i.e., causal power better captured the basis of prediction generation  
25 (option ii above). Further, bias was positively correlated with causal power ( $P\{\beta_1>0\}=0.04$ ; Fig

1 1H). This suggests that subjects based predictions on trial-by-trial updates of inferred “causal”  
2 relationships between sounds and images, rather than just correlations.

3 The HDDM also provides a framework to model drug effects. Thus, we repeated the above  
4 analysis of subjects’ behavior under ketamine and under DEX. If ketamine prevents predictive  
5 information from conferring a behavioral advantage, all sounds will generate similar biases; i.e.,  
6 there will be no correlation between the bias and the predictive value of sounds, so  $\beta_1$  will be  
7 zero. Indeed, under ketamine,  $\beta_1$  was not different from zero ( $P\{\beta_1>0\}=0.76$ ; Fig 1H). In contrast,  
8 under DEX, bias positively correlated with the predictive values of sounds (all sounds  
9 generating equal vs different biases,  $P\{\beta_1>0\}<0.00001$ ; Fig 1H) similar to baseline. After  
10 recovery from ketamine, once again  $\beta_1$  was greater than zero ( $P\{\beta_1>0\}<0.00001$ ; Fig 1H)  
11 confirming that subjects had again generated larger bias for more predictive sounds. The  
12 question is: (a) did subjects re-gain access to previously learned and stored predictive  
13 information (Fig S2B) or (b) did they re-learn the predictive value of each sound after recovery  
14 from ketamine (Fig S2C)? To answer this, we used the HDDM to analyze the first 30 trials for  
15 each subject after recovery (translating to approximately 10 trials for each sound cue, for every  
16 subject). We found that, only for the former (option (a)), bias positively correlated with causal  
17 power ( $P\{\beta_1>0\}=0.03$ ; Fig S2D). This suggests that ketamine did not produce a loss of  
18 previously learned predictive information, but rather ketamine prevented access to the predictive  
19 information.

20

21 ***Strength of predictive information correlated with frontal alpha power.*** We next  
22 investigated the circuit-level mechanism of prediction. To show task-responsive EEG  
23 electrodes, we averaged the time-frequency response across all trials and all electrodes (this  
24 selection procedure does not bias towards particular predictions). This revealed a task-related

1 increase in baseline-corrected alpha power (8-14Hz; Fig S3B) before drug administration. Four  
2 clusters of electrodes, right frontal (RF), right central (RC), left central (LC) and occipital (OC),  
3 showed significant modulation of delay period alpha power compared to baseline, irrespective of  
4 sound (Fig 3A). Considering alpha power as an index of neural excitability (reduced alpha  
5 indicating reduced inhibition/increased excitability) [34,35], one might expect stronger  
6 predictions to be associated with lower alpha power, reflecting greater activation of prediction-  
7 encoding neurons. This was the case for the RF cluster. There was greater reduction of alpha  
8 power across the delay period after more predictive sounds (Fig 2A-C). We hypothesized that  
9 this differential alpha modulation should characterize the pre-drug baseline and DEX conditions,  
10 but not ketamine as it prevented predictive information from conferring a behavioral advantage.  
11 To test this hypothesis, similar to the RT analysis (except that EEG was not recorded after  
12 recovery from drug), we ran a LME model. We regressed delay period alpha power at the RF  
13 electrode cluster on sounds' predictive value (HP, MP, NP) and drug condition (before drug,  
14 under ketamine, under DEX) [RF alpha power ~ sounds' predictive value + drug condition +  
15 sounds' predictive value x drug condition]. To test the effect of sounds' predictive value, we  
16 used a linear contrast (HP, MP, NP: -1, 0, 1) as our contrast of interest, and a quadratic contrast  
17 (HP, MP, NP: -1, 2, -1) as the orthogonal contrast in the analysis. To test our hypothesis that the  
18 RF alpha power modulation before drug will change under ketamine but not under DEX, we  
19 used a quadratic contrast (before drug, under ketamine, under DEX: -1, 2, -1) as our contrast of  
20 interest, and a linear contrast (before drug, under ketamine, under DEX: -1, 0, 1) as the  
21 orthogonal contrast in the analysis (see below). The significant main effect of sounds' predictive  
22 value confirmed stronger predictions correlated with lower delay period alpha power at the RF  
23 electrode cluster (ANOVA,  $F(1, 26.24)=4.82$ ,  $P=0.0003$ , orthogonal contrast non-significant; Fig  
24 2A-D; and Fig S3D-F). Hence, frontal alpha reflected predictions.

1 To rule out the possibility that our RF spectral results are due to an impact on lower-level  
2 feedforward sensory processing, we also investigated if there were differences in the auditory  
3 ERPs of HP, MP and NP sounds. We tested for an effect over the entire time course between  
4 50 to 300 ms after sound onset. Cluster-based permutation tests [36] revealed no significant  
5 difference between HP, MP and NP sounds in any electrodes at any latency. This confirmed  
6 that the correlation between the strength of predictions and frontal alpha power was not due to  
7 feedforward sensory processing, as all three sounds generated similar auditory ERPs (Fig S3A).

8 **Fig 2. Right frontal alpha power correlated with prediction strength, and ketamine**

9 **prevented this correlation. See also Fig S3.** (A-C) Population time-frequency decomposition  
10 of right frontal electrode cluster (RF) before drug administration (Pre), for highly predictive (HP;  
11 A), moderately predictive (MP; B), and not-match predictive (NP; C) sounds. Power calculated  
12 in 0.55 s sliding windows, with window at 0 s representing interval -0.275 s to +0.275 s. (D-F)  
13 Population average RF alpha power in delay period (0.625 s to 0.275 s before image onset; this  
14 window size chosen based on wavelet length, to exclude stimulus-evoked activity – see  
15 methods) for (D) Pre, (E) ketamine (Keta) and (F) Dexmedetomidine (Dex).

16

17 ***Ketamine disrupted the correlation between predictions and frontal alpha power.*** NMDAR

18 blockade has been shown to increase frontal cortical excitability [18–21], reducing response  
19 selectivity and SNR [37,38]. We thus expect low-dose ketamine to increase frontal cortical  
20 excitability irrespective of the predictive value of sounds. This would manifest as similarly low  
21 RF alpha power for all sounds. Using our LME model, we found a significant interaction of  
22 prediction and drug condition (ANOVA,  $F(1,19.04)=2.81$ ,  $P=0.0007$ ). The interaction effect  
23 confirmed that, under ketamine, delay period alpha power at the RF electrode cluster was  
24 similar across sounds (Fig 2E). Whereas, for DEX, RF alpha power still showed a linear trend

1 (Fig 2F) similar to the pre-drug baseline. This was not due to a more general drug-related  
2 change in alpha power, as power estimates were corrected based on the power prior to sound  
3 onset. Moreover, this was not due to a change in feedforward sensory processing under  
4 ketamine as cluster-based permutation tests [36] revealed no significant difference between HP,  
5 MP and NP sounds at any electrodes at any latency, i.e., all three sounds still generated similar  
6 auditory ERPs to that before ketamine. This suggests that ketamine affects mechanisms  
7 representing predictive information, and not basic sensorimotor mechanisms. That is, NMDARs  
8 mediate prediction strength through modulation of frontal excitability (reflected in alpha power).

9

10 ***Decodability of predictions reduced under ketamine.*** Increased frontal excitability does not  
11 necessarily translate to useful prediction, if it reduces SNR (e.g., due to a more general change  
12 in excitability). We propose that increased frontal excitability (indicated by reduced alpha power)  
13 could facilitate better prediction, but this would not be the case if increased excitability reduced  
14 the SNR. To test this, we trained a decoder to measure if this hyperexcitability, reflected in low  
15 RF alpha power, still allows differential representation of predictions. Greater classification  
16 accuracy of each sound's predictive value during the delay period would be consistent with a  
17 higher SNR of the neural representation of the prediction. Before ketamine, the classification F-  
18 score for each sound separated at 560 ms after sound onset (ANOVA,  $P=0.0018$ ) and remained  
19 separate across the delay period until image presentation (Fig 3B). Similarly, classification F-  
20 score for DEX separated at 620 ms after sound onset (ANOVA,  $P=0.0067$ ) and remained  
21 separate (Fig 3D). This shows that the more predictive the sound, the better the classification  
22 (HP>MP>NP). In contrast, under ketamine, there was no separation of classification F-score for  
23 each sound, and classification accuracy overall was lower (ANOVA,  $P=0.48$ ; Fig 3C). This is  
24 consistent with ketamine disrupting the alpha indexing of predictive value. The weighting of  
25 features contributing to classifier performance confirmed that, before ketamine, RF alpha power

1 contributed most to classification accuracy (RF alpha power feature ( $W_{RF\alpha}$ ) > other features  
2 ( $W_{\sim RF\alpha}$ ), ANOVA,  $P=0.008$ ; Fig 3F). This was also true under DEX ( $W_{RF\alpha} > W_{\sim RF\alpha}$ , ANOVA,  
3  $P=0.013$ ; Fig 3H). Under ketamine, RF alpha power contributed little to classification accuracy  
4 ( $W_{RF\alpha} > W_{\sim RF\alpha}$ , ANOVA,  $P=0.51$ ; Fig 3G). These results suggest that ketamine disrupts the  
5 expression of predictive value in the power of RF alpha activity, which may be due to decreased  
6 SNR.

7 **Fig 3. Ketamine prevented decoding of predictions.** (A) Electrode clusters in right frontal  
8 (RF), right central (RC), left central (LC), and occipital (OC) cortex showing significant  
9 modulation in delay period alpha power (black circles represent the electrode that showed the  
10 greatest modulation, and its four nearest neighbors; we selected 5 electrodes in this way for  
11 consistency across clusters). Average across all trials (HP, MP and NP). (B-D) F-score using  
12 support vector machine (SVM) to decode predictive value (highly predictive, HP; moderately  
13 predictive, MP; or not-match predictive, NP) of sound, based on time-frequency power spectrum  
14 (B) before drug administration (Pre), (C) under ketamine (Keta), and (D) under  
15 dexmedetomidine (Dex). Dashed vertical line at 0 s denotes sound onset. Dashed vertical line  
16 at 1.225 s denotes earliest possible time window including image onset. Dashed horizontal line  
17 signifies level of decoding expected by chance. Gray shaded areas indicate significant zone of  
18 separation between HP, MP and NP, prior to image onset. (E) Posterior probability density of  
19  $\beta_{1\alpha}$ . Bias (z) calculated for each trial (t) using alpha power (AP).  $\beta_{1\alpha}$  determines relationship  
20 between z and AP. (F-H) Feature weights from SVM decoder for (F) Pre, (G) Keta, and (H) Dex.  
21  $\theta$ ,  $\alpha$ ,  $\beta$ , and  $\gamma$  indicate theta (5-7 Hz), alpha (8-14 Hz), beta (15-30 Hz), and gamma (30-45 Hz)  
22 bands respectively.

23

1 **Frontal alpha power correlated with RTs on trial-by-trial basis; but ketamine perturbed**  
2 **the correlation.** Although frontal activity correlates with the predictive value of sounds, we need  
3 to show that subjects use it, i.e., that RF alpha power is linked to behavior. We again used the  
4 HDDM, but now to test whether RF alpha power predicts RT on a trial-by-trial basis. As before,  
5 the HDDM included two boundaries representing the possible choices in match trials, i.e.,  
6 correct/incorrect. The starting point of the drift process – modeled from image onset – is  
7 determined by the RF alpha power in the delay period for each trial, which may be biased  
8 towards one of the boundaries, and is reflected in the bias parameter,  $z$ . We calculated the  
9 posterior probability density of the regression coefficient,  $\beta_{1\alpha}$ , which determines the relationship  
10 between the bias ( $z$ ) and RF alpha power. Bias was inversely correlated with RF alpha power  
11 ( $P\{\beta_{1\alpha}<0\}=0.04$ , Fig 3E). This suggests that for more predictive sounds, lower RF alpha power  
12 creates a larger bias, and as a result, decisions are reached quicker (quicker RT). In contrast,  
13 ketamine blocked the correlation between bias and alpha power (regression coefficient,  $\beta_{1\alpha}$ , did  
14 not differ from zero,  $P\{\beta_{1\alpha}<0\}=0.51$ ; Fig 3E). This suggests that subjects used frontal activity to  
15 make predictions.

16

17 **Predictive sounds activated sensory representations prior to visual stimuli; but ketamine**  
18 **perturbed these pre-stimulus activations.** Prior work suggests that predictions can activate  
19 sensory templates prior to visual stimuli onset [39,40]. To test which neural circuits and  
20 receptors contribute to this, we used a time generalized deep recurrent neural network (RNN) to  
21 classify visual stimuli (V1, V2, V3) at successive time bins (20 ms) across a trial. Visual  
22 representations are often activated as early as 50ms after stimulus onset [40]. To capture this  
23 early representation in our analysis, we trained our classifier with EEG time series data (not  
24 power) from the RF, RC, LC and OC electrode clusters, as spectral data corresponding to the  
25 visual stimulus presentation may be contaminated with pre-stimulus or motor activity due to the



1 wavelet window size. Fig 4 A-C shows the cross-temporal decoding accuracy at different trained  
2 (y-axis) and tested (x-axis) time bins across the delay period and after visual stimulus onset.  
3 The white contour shows decoding accuracy significantly above chance (33%). We found  
4 significant classification accuracy above chance during the delay period well before visual  
5 stimulus onset for the “before drug” (Fig 4A) and DEX (Fig 4C) conditions. Crucially, when we  
6 trained the classifier on visual stimulus-evoked activity, e.g., at 100 ms post-stimulus onset  
7 (around the peak visual response) and tested in the delay period, as highlighted with the black  
8 dashed rectangle, there was significant decoding earlier in the delay period for the “before drug”  
9 and DEX conditions (pre-drug baseline: starting at 492 ms before stimulus onset;  $t(20,1000)$   
10  $=6.4$ ,  $P=0.008$ ; Fig 4A; and DEX: starting at 392 ms before stimulus onset;  $t(20,1000)=4.3$ ,  
11  $P=0.011$ ; Fig 4C), compared to ketamine (starting at 116 ms before stimulus onset;  $t(20,1000)$   
12  $=2.23$ ,  $P=0.03$ ; Fig 4B). This confirmed activation of visual stimulus representations before  
13 stimulus onset; and that ketamine perturbed such pre-stimulus activations.

14 Next, we probed which factors drive such pre-visual stimulus activations. We hypothesized that  
15 predictive sounds activate these early visual representations. That is, when subjects hear a  
16 predictive sound cue, they pre-activate a representation of its paired image during the delay  
17 period. Moreover, we posited that the strength of pre-activation will depend on the predictive  
18 value of the sound cue. Hence, the HP sound will pre-activate V1’s representation most  
19 strongly, followed by the MP sound moderately pre-activating V2’s representation, and the NP  
20 sound leading to little/no pre-activation of V3’s representation. To test our hypothesis, we  
21 measured how well the decoder classifies each of V1, V2 and V3 – expecting better  
22 classification performance for  $V1 > V2 > V3$  – after training on visual-evoked activity (100 ms after  
23 stimulus onset reported here) and testing on the entire time across a trial. This relates to the row  
24 corresponding to the training time 100 ms post-visual stimulus onset in Fig 4A-C (black dashed  
25 rectangle), but now we further calculated the F-score for V1, V2 and V3 individually. During the

1 delay period, we found the highest classification F-score for V1 followed by V2 then V3. For the  
2 “before drug” baseline, the classification F-score for V1, V2 and V3 separated at 200 ms prior to  
3 visual stimulus onset (ANOVA,  $F(20)=5.3$ ,  $P=0.003$ ) and remained separate thereafter, as  
4 shown by the blue horizontal line in Fig 4D. Similarly, the classification F-score for DEX  
5 separated 84 ms prior to visual stimulus onset (ANOVA,  $F(20)=3.2$ ,  $P=0.011$ ) and remained so  
6 (Fig 4F). In contrast, for the classification F-score under ketamine, there was no separation  
7 during the delay period, and the F-score curves only separated 12 ms after visual stimulus  
8 onset (ANOVA,  $F(20)=2.4$ ,  $P=0.024$ ; Fig 4E).

9 To further confirm that such differential pre-activation of visual representations are driven by the  
10 predictive value of their paired sound cues, we identified which sound cue (HP, MP or NP)  
11 preceded the correctly classified V1, V2 or V3 stimulus, when trained at 100 ms post-visual  
12 stimulus onset and tested at 100 ms prior to visual stimulus onset (vertical black dashed line in  
13 Fig 4D-F denotes testing time). One might expect HP sounds to precede pre-activation of their  
14 predicted V1 image representation, predominantly MP sounds to precede pre-activation of their  
15 predicted V2, and little bias for V3. For both “before drug” and DEX conditions, we indeed found  
16 that: for trials classified as V1, the proportion of HP sound cues was significantly higher than  
17 that for MP or NP (ANOVA, Pre-drug:  $F(20)=8.8$ ,  $P=0.0001$ , Fig 4G; Dex:  $F(20)=4.3$ ,  $P=0.001$ ,  
18 Fig 4I); for trials classified as V2, the proportion of MP sound cues was significantly higher than  
19 that for HP or NP (ANOVA, Pre-drug:  $F(20)=6.1$ ,  $P=0.0007$ , Fig 4G; DEX:  $F(20)=3.2$ ,  $P=0.004$ ,  
20 Fig 4I); but for trials classified as V3, there were no significant difference in the proportion of HP,  
21 MP and NP sound cues (ANOVA, Pre-drug:  $F(20)=0.80$ ,  $P=0.07$ , Fig 4G ; DEX:  $F(20)=0.66$ ,  
22  $P=0.1$ , Fig 4I). Conversely, under ketamine, there was no significant difference in the proportion  
23 of HP, MP and NP sound cues for any image (ANOVA,  $F(20)=0.33$ ,  $P=0.31$ ; Fig 4H).

24 Previous functional MRI [41] and EEG [42–44] studies found visual-evoked responses to  
25 greebles in higher-order sensory cortex of the right hemisphere. One might expect pre-

1 activation of predicted greeble representations in the same region. Accordingly, the RC  
2 electrode cluster contributed most to the classification accuracy for both the “before drug”  
3 (ANOVA,  $F(20)=4.3$ ,  $P=0.002$ ; Fig 4J) and DEX (ANOVA,  $F(20)=3.8$ ,  $P=0.01$ ; Fig 4L) conditions,  
4 when we trained on data 100 ms post-visual stimulus onset and tested on the entire time across  
5 a trial. Crucially, the RC cluster significantly contributed to classification accuracy during the  
6 delay period for both “before drug” and DEX (476ms before visual stimulus onset for “before  
7 drug” and 344ms before stimulus onset for DEX). In contrast, under ketamine, the RC cluster  
8 did not significantly contribute to the classification accuracy until much later (52 ms before visual  
9 stimulus onset; ANOVA,  $F(20)=2.9$ ,  $P=0.011$ ; Fig 4K). Taken together, this suggests that NMDA  
10 receptors contribute to the pre-stimulus sensory templates activated by predictions.

11 **Fig 4. Ketamine perturbed pre-stimulus representations of predicted images.** (A-C) Cross-  
12 temporal classification accuracy of images (V1, V2 or V3) based on time domain EEG data  
13 across all four clusters: (A) before drug administration (Pre), (B) under ketamine (Keta), and (C)  
14 under dexmedetomidine (Dex). Vertical and horizontal white dashed lines denote image onset.  
15 White solid contours in A-C show significantly above chance classification accuracy. Black  
16 dashed rectangle denotes time period used in D-F when classifier was trained on data 0.1 s  
17 post-visual stimulus onset and tested on the delay period pre-image onset. (D-F) Performance,  
18 measured as F-score, classifying V1, V2 and V3 trials when trained on 0.1 s post-image onset  
19 and tested on entire time period: (D) Pre, (E) Keta, and (F) Dex. Solid vertical black line denotes  
20 image onset. Dashed horizontal black line denotes chance level F-score. Dashed vertical black  
21 line denotes testing time, 0.1 s prior to visual stimulus onset, used in G-I. Blue horizontal line  
22 denotes significant difference between V1, V2 and V3’s classification. (G-I) Proportion of highly  
23 predictive (HP), moderately predictive (MP) and not-match predictive (NP) sound cues in trials  
24 correctly classified as V1, V2 and V3 by the classifier trained on 0.1 s post-visual stimulus onset  
25 and tested at 0.1 s before visual stimulus onset: (G) Pre, (H) Keta, and (I) Dex. (J-L) Feature

1 weights when classifier trained at 0.1 s post-image onset and tested on the entire time across a  
2 trial in A-C: (J) Pre, (K) Keta, and (L) Dex.

3

4 ***Strength of predictions correlated with feedback operating at beta frequencies.*** To

5 investigate how predictions generated frontally influence pre-stimulus sensory templates, we  
6 measured functional connectivity between these frontal and sensory sites. Specifically, we  
7 calculated non-parametric spectral Granger causality in both EEG sensor and source spaces.  
8 For both spaces, we found frontal influences on sensory cortex dependent on the predictive  
9 value of sounds. We focus on source space results here (due to potential mixing of source  
10 signals in sensor space complicating connectivity analyses). Since frontal alpha power reflected  
11 the predictive value of sounds, we first calculated sources of sensor-level, task-related  
12 increases in baseline-corrected alpha power. ROIs in Fig 5A inset showed significantly  
13 increased source power during the delay period compared to baseline ( $p < 0.025$ , Bonferroni  
14 corrected across all cortical AAL ROIs, to ensure robust task-related sources). We found frontal  
15 cortical contributions to increased sensor-level alpha power in the right hemisphere only, as well  
16 as temporal cortical contributions consistent with previous greeble studies [41]. Consequently,  
17 we restricted our source-level Granger causality analysis between these sources within the right  
18 hemisphere. Using non-parametric spectral Granger causality, we measured the source-level  
19 feedback from the superior and medial frontal gyrus (Fig 5A, green) to inferior temporal gyrus  
20 (Fig 5A, red). Theoretically, the audio-visual task should anatomically isolate predictions  
21 transmitted along feedback pathways to posterior visual areas during the delay period from the  
22 feedforward auditory signals. One might expect higher frontal excitability (from stronger  
23 predictions or effect of ketamine) to give rise to stronger feedback. To test this, we ran the same  
24 LME model as for our previous EEG analyses. But here we regressed source-level beta band  
25 (15-30 Hz) feedback from the superior and medial frontal gyrus (Fig 5A, green) to inferior

1 temporal gyrus on sounds' predictive value (HP, MP, NP) and drug condition (before drug,  
2 under ketamine, under DEX) [beta feedback ~ sounds' predictive value + drug condition +  
3 sounds' predictive value x drug condition]. To test the effect of sounds' predictive value, we  
4 used a linear contrast (HP, MP, NP: -1, 0, 1) as our contrast of interest, and a quadratic contrast  
5 (HP, MP, NP: -1, 2, -1) as the orthogonal contrast in the analysis. To test our hypothesis that the  
6 beta feedback effect before drug will be perturbed under ketamine but not under DEX, we used  
7 a quadratic contrast (before drug, under ketamine, under DEX: -1, 2, -1) as our contrast of  
8 interest, and a linear contrast (before drug, under ketamine, under DEX: -1, 0, 1) as the  
9 orthogonal contrast in the analysis. A significant main effect of sounds' predictive value  
10 (ANOVA,  $F(1,30.46)=11.47$ ,  $P=0.0001$ , orthogonal contrast non-significant) showed stronger  
11 predictions were associated with greater Granger causal influence of right frontal cortex on right  
12 inferior temporal cortex in the beta band during the delay period (Fig 5, A and B). Taken  
13 together, this suggests predictions are disseminated along feedback connections down the  
14 cortical hierarchy prior to image onset.

15

16 **Fig 5. Beta feedback correlated with prediction strength, but ketamine perturbed this**

17 **correlation.** (A) Population average non-parametric Granger causal influence from right frontal  
18 to right inferior temporal cortex in the beta band (15-30 Hz) during the delay period (starting 0.9  
19 s before image onset). Highly predictive, HP; moderately predictive, MP; not-match predictive,  
20 NP. Inset shows regions of significantly increased source power during delay period compared  
21 to baseline ( $P < 0.025$ , Bonferroni corrected across all cortical AAL regions) after beamforming  
22 source localization. Green, superior and middle frontal gyrus; Red, inferior temporal gyrus. (B)  
23 Population average non-parametric spectral Granger causal influence during delay period. (C)  
24 and (D) Population average non-parametric Granger causal influence from right frontal to right

1 inferior temporal cortex in beta band during delay period for (C) ketamine (Keta) and (D)  
2 dexmedetomidine (Dex).

3

4 ***Ketamine perturbed the correlation between prediction strength and beta feedback.***

5 Because NMDAR blockers have been reported to perturb feedback pathways in macaques [23]  
6 and humans [45], we expected ketamine to alter feedback (carrying predictions) from frontal to  
7 inferior temporal cortex. We do not expect such modulations of feedback pathways under DEX  
8 as DEX did not change correlation of RT and frontal alpha power with prediction. We found a  
9 significant interaction of prediction and drug condition (ANOVA,  $F(1,24.98)=2.61$ ,  $P=0.04$ ). The  
10 significant interaction effect demonstrated that, under ketamine, there was no longer a  
11 correlation between the predictive value of sounds and beta band Granger causal influence of  
12 right frontal on right inferior temporal cortex (Fig 5C); i.e., ketamine scrambled the feedback for  
13 each sound. In contrast, for DEX, the Granger causal influence in the beta band still differed  
14 between sounds (Fig 5D). This suggests that the predictive feedback facilitating behavior  
15 depends on NMDARs.

16

17 **Discussion**

18 Our results show NMDAR-mediated, circuit-level mechanisms of prediction and its behavioral  
19 effects. Frontal cortex represented predictions and, starting prior to image onset, transmitted  
20 them to posterior cortex in the beta band, to activate a sensory representation of the predicted  
21 image. Stronger predictions enabled faster responses, and reflected causal power, i.e., inferred  
22 “causal” relationships between sounds and images. In contrast, ketamine prevented fast  
23 responses to predictive stimuli, as well as subjects from using the strength of causal power to  
24 generate predictions. At the circuit level, ketamine disrupted predictions by reducing frontal

1 alpha power to the same low level prior to all images (likely indicating reduced SNR), leading to  
2 undifferentiated feedback and perturbed pre-stimulus sensory activations. Overall, it suggests  
3 that NMDARs normally sharpen representations of predictions in frontal and posterior cortex, to  
4 enable PC. The data are less supportive of the classical view of perception, with its emphasis  
5 on feedforward processing to reconstruct images because one might have expected little  
6 systematic difference in behavioral and neural measures for different predictive conditions.

7

8 The initial predictive auditory stimulus will activate auditory pathways, leading to the generation  
9 of a prediction of the subsequent visual image by a higher-order, multi-modal area. Complex  
10 auditory stimuli, like the trisyllabic greeble names in our task, are represented in auditory lateral  
11 belt and parabelt cortex [46]. Belt and parabelt regions are connected with a number of multi-  
12 modal areas in superior temporal and prefrontal cortex [47,48], where there are multisensory  
13 neurons responding to both vocalizations and images [49,50]. Recent work [51] suggests that  
14 early sensory fusion occurs in temporal or parietal multimodal areas, whereas more flexible  
15 weighting and integration of sensory signals for adaptive behavior occurs in frontal multimodal  
16 areas. Our results are consistent with this, but go further by showing that the frontal multimodal  
17 areas are the source of predictive multimodal signals, which, in addition to the enhancement of  
18 sensorimotor processing shown here, may be useful for communication and language  
19 processing [52]. Interestingly, we found that the frontal source and posterior target – showing  
20 pre-stimulus sensory activations of the predicted greeble – of predictive information was  
21 lateralized to the right hemisphere. This is consistent with previous studies suggesting a  
22 possible right hemispheric bias for the processing of greebles [41,53,54], and possibly faces  
23 more generally [55,56].

1 There have been two broad approaches for understanding how we learn relationships between  
2 stimuli: associative and causal approaches. Classical theories like the Rescorla-Wagner model  
3 [57–59] propose learning as the association between a cue and an outcome. Causal models of  
4 learning [33,60,61], on the other hand, propose that we learn relationships between latent  
5 unobservable “causes” and observable stimuli (both cues and outcomes). In other words, causal  
6 learning models have put forward the idea of “clustering”, where observations (related to both  
7 cue and outcome) are clustered together according to their hypothetical latent causes. In line  
8 with previous work [62,63], we found that subjects’ RTs were best predicted by a causal model  
9 (casual power) and not an associative model (transitional probability). Our causal learning  
10 results have further implications on models of sequential learning. Previous work on causal  
11 learning focused on summarized data contingency [33,64]. Our findings support trial-by-trial  
12 learning from sequential data as proposed by a recent modelling study [65]. Additionally, using  
13 HDDM we found that both RF alpha power and causal power correlated to RT on a trial-by-trial  
14 basis. This points towards a neural readout of causal inference in humans.

15 Although beta oscillations have been proposed to maintain the current brain state [66,67], there  
16 is growing evidence of beta activity playing a more dynamic role [68]. It has been proposed that  
17 beta oscillations are suitable for endogenous re-activation of cortical representations, to  
18 facilitate task-relevant activity patterns and cognitive demands [68]. In line with this, we found  
19 beta band predictive feedback from right frontal to inferior temporal cortices reactivates greeble  
20 representations in posterior cortex prior to image onset. Spitzer and Haegens [68] speculate  
21 that beta band activity is well suited to be a ‘transit’ between alpha frequency (generally  
22 associated with cortical excitation/inhibition [69,70]) and gamma frequency (generally  
23 associated with population spiking and active stimulus coding [71]) activity. Our finding of frontal  
24 cortical alpha power coding for the predictive value of sound cues, followed by frontal influence



1 on temporal areas (shown to have greeble representations [41,42,44]) at beta frequencies prior  
2 to visual-evoked activity, supports beta's role as a 'transit' band.

3

4 Intracortical laminar recordings in animal studies of sensory and attentional processing suggest  
5 that feedforward signaling operates at gamma frequencies, whereas feedback signaling  
6 operates at lower frequencies [72-74]. Consistent with this, previous work on predictive  
7 processing using univariate measures has reported the involvement of various lower  
8 frequencies, including theta, alpha and beta bands [75-77]. Although there are varying reports of  
9 the direction of alpha power changes in predictive processing, this may be due to "when" or  
10 "what" is being predicted, differences in task structure (e.g., analyzing the stimulus or delay  
11 period) and differences between brain regions [75,78]. Further considering connectivity, a recent  
12 macaque study reported greater alpha and beta feedback from prefrontal to visual cortex during  
13 the presentation of more predictive visual stimuli [76]. Van Pelt et al. [79] also found strongest  
14 top-down feedback connectivity in the beta band while subjects viewed videos of predictable  
15 events. Our finding of frontal cortex causally influencing posterior cortex in the beta band  
16 according to predictions extends this finding to the delay period in the absence of sensory  
17 stimulation, as well as provides support for PC models that incorporate a key role for oscillatory  
18 activity more generally [75,80,81].

19

20 NMDARs are located in both superficial and deep cortical layers [22], potentially allowing  
21 NMDARs to modulate the representation of predictions in deep layers, as proposed in certain  
22 PC models [80], and predictive feedback signaling to superficial and/or deep layers. NMDAR  
23 blockade in humans has been shown to modulate frontal cortical excitability [20,21], and our  
24 decoding analyses suggest that this NMDAR-related change in excitability reduces the SNR of

1 prediction representations. This is consistent with macaque experiments showing that NMDAR  
2 blockade reduces the SNR in frontal cortex during the working memory period of an anti-  
3 saccade task [37]. In our study, NMDAR blockade also perturbed predictive feedback,  
4 consistent with macaque experiments showing NMDARs contribute to feedback signaling [23].  
5 Taken together, these results suggest NMDARs influence both the representation of predictions  
6 in higher-order areas and predictive signaling to lower-order areas, which impacts the formation  
7 of pre-stimulus templates.

8

9 Ketamine at sub-hypnotic doses perturbed feedback connectivity from frontal to more posterior  
10 cortex – but not evoked activity in sensory cortices – during which subjects could still perceive  
11 and accurately respond to audio-visual stimuli. This raises questions about the requirement of  
12 frontal feedback integrity for consciousness. Further, it has been proposed that generative  
13 models create virtual realities that support conscious experience [11–13]. That subjects’  
14 predictions in our study could be disrupted without impairing consciousness imposes constraints  
15 on PC as a theory of consciousness.

16

17

18

1 **Materials and Methods**

2

3 **RESOURCE AVAILABILITY**

4

5 *Lead Contact and Materials Availability*

6

7 This study did not generate new unique reagents. Further information and requests for

8 resources, equipment and experimental methods should be directed to and will be fulfilled by

9 the Lead Contact, Yuri Saalman ([saalman@wisc.edu](mailto:saalman@wisc.edu)).

10

11 *Data Availability Statement*

12

13 Data generated in the study can be found here <https://osf.io/3z49m/>

14

15

16 **EXPERIMENTAL MODEL AND SUBJECT DETAILS**

17 The University of Wisconsin-Madison Health Sciences and Social Sciences Institutional Review

18 Boards (IRBs) approved experiments. 29 participants (14 female) performed the psychophysics

19 predictive coding experiment. We excluded data from four subjects as their performance

20 accuracy was below 50%. 17 additional participants (six female) for dexmedetomidine and 15

21 participants (five female) for ketamine took part in the pharmacology predictive coding

22 experiments (mean age = 22.35 years; SD = 2.82 years). Of the 15 participants who performed

23 ketamine experiments, the first 12 had to participate in the dexmedetomidine experiments first

24 as per IRB requirements, whereas the final three participated in ketamine experiments first. The

25 different orders of drug experiments yielded similar results. Three participants also performed in

26 saline control experiments, which yielded results similar to the pre-drug baseline. Three

27 participants (from 17 dexmedetomidine participants) were excluded for low accuracy (accuracy

28 less than 50%). Participants who performed the psychophysics predictive coding experiment did

29 not take part in the pharmacology experiments. We obtained informed consent from all

30 participants.

31 **METHOD DETAILS**

32

## 1 *Stimuli*

2 For our psychophysics experiments, we used biomorphic visual stimuli from Michael Tarr's lab  
3 ([http://wiki.cnbc.cmu.edu/Novel\\_Objects](http://wiki.cnbc.cmu.edu/Novel_Objects)). These are known as greebles. Fig 1A shows  
4 examples presented to participants. We used three gray-scale greebles for each psychophysics  
5 session, and each greeble was personified with a name. We used novel sounds (trisyllabic  
6 nonsense words) for the greeble names – e.g., “Tilado”, “Paluti”, and “Kagotu” – from Saffran et  
7 al. [82]. The sounds were generated using the Damayanti voice in the “text to speech” platform  
8 of an Apple MacBook. To avoid differences in the salience of stimuli, greeble images have  
9 similar size (13 degrees of visual angle in height and 8 degrees in width), number of extensions  
10 and mean contrast, and greeble names have the same number of syllables and sound level (80  
11 dB SPL).

12 For the pharmacology experiments, we generated three new triplets of greebles. To control for  
13 saliency, each participant rated greeble salience for each of four (three plus one from the  
14 psychophysics experiment) triplets, i.e., the participant identified whether any of the greebles in  
15 a triplet stand out compared to the other two greebles from the same triplet. We proceeded to  
16 use triplets which the participant rated all three greebles as being equally salient. We then  
17 named each of these greebles with a new trisyllabic nonsense word.

## 18 *Audio-visual delayed match-to-sample task*

19 Each trial of the task involves the sequential presentation of a sound (trisyllabic nonsense word)  
20 followed by a greeble image. We refer to stimuli using the following notation: A1, A2 and A3  
21 correspond to each of the three sounds used (A for auditory) and V1, V2 and V3 correspond to  
22 each of the greebles used (V for visual). Using this notation, audio-visual stimulus sequences  
23 containing the matching name and greeble are A1-V1, A2-V2 and A3-V3. Audio-visual stimulus  
24 sequences containing a non-matching name and greeble are A1-V2, A1-V3, A2-V1, A2-V3, A3-

1 V1 and A3-V2. We pseudo-randomized names for greebles (i.e., matching sounds and images)  
2 across subjects.

3 *Learning Phase.* During the first phase of the task, participants learn the association between  
4 the sounds and images (i.e., names of the greebles) through trial-and-error, by performing a  
5 match/non-match (M/NM) task. This phase is called the “learning” phase. Each trial starts with  
6 blank blue screen (R=35, G=117, B=208, 200ms duration; shown as gray in Fig 1A). After that,  
7 a black fixation cross (size 1.16 degrees of visual angle; jittered 200-400 ms) is presented  
8 followed by a sound, a greeble name voiced by the computer (600 ms duration). After a jittered  
9 delay period (900-1,200 ms duration), a greeble image (until a participant responds or 1,100 ms  
10 duration, whichever is earliest) was presented on the monitor screen, as well as two symbols ( $\surd$   
11 and **X**) to the left and right of the greeble (9.3 degrees of visual angle from screen center).  
12 These symbols indicated participants’ two response options: match ( $\surd$ ) or non-match (**X**). The  
13 symbol location, left or right of the greeble image, corresponded to the left or right response  
14 button, respectively: left and right arrow keys of a computer keyboard in the psychophysics  
15 experiments; and left and right buttons of a mouse in the pharmacology experiments. We  
16 randomly varied the symbols’ locations relative to the greeble image to minimize motor  
17 preparation (i.e., on some trials, a match response required a left button press and, on other  
18 trials, a match response required a right button press). In the learning phase, each greeble  
19 name and image had 33% probability of appearing in any given trial. This is to prevent subjects  
20 from developing any differential predictions about the greebles due to greeble name or image  
21 frequency, during the learning phase.

22 To address possible same-different biases, e.g., quicker reaction times (RTs) for match trials  
23 [31] we introduced a control called “inversion trials” in psychophysics experiments, to minimize  
24 the expectation of M/NM trials which, in itself, might otherwise contribute to participants’  
25 responses. In these inversion trials, participants had to respond whether the greeble image

1 presented on screen is inverted (the appropriate response button, left/right, indicated on screen  
2 by the left/right location of a red arrow pointing down) or upright (yellow arrow pointing up).  
3 Participants did not know the type of trial in advance; the trial type was only revealed by the  
4 symbols to the left and right of screen center at the onset of the greeble image (i.e.,  $\surd$  and  $\times$   
5 signal M/NM trials, whereas downward red arrow and upward yellow arrow signal inversion  
6 trials). 50% of the total number of trials in the learning phase were inversion trials and the rest  
7 were M/NM trials. Because participants cannot specifically prepare in advance for M/NM trials  
8 due to the random presentation of inversion and M/NM trials, there should be minimal  
9 confounding of RTs with a bias towards match responses.

10 *Testing phase.* Once participants show above 80% accuracy for the M/NM trials in the learning  
11 phase of the task, they move on to the “testing phase” (1,000 trials for the psychophysics  
12 experiments; Fig 1A). During the testing phase, we manipulated predictions by changing the  
13 probability of a greeble appearing after its learnt name. This probability is different for each  
14 greeble name and image. That is, in the testing phase, when a participant hears A1, there is  
15 85% chance of V1 being shown (highly predictive; HP); when a participant hears A2, there is  
16 50% chance of V2 being shown (moderately predictive; MP); and when a participant hears A3,  
17 there is a 33% chance of V3 being shown (not-match predictive; NP). This allows participants to  
18 make stronger predictions about the identity of the upcoming visual image after hearing A1, than  
19 after hearing A2 or A3, for instance.

20 Inversion trials also consisted of half the total trials in the testing phase of the psychophysics  
21 experiments. We randomly presented all the trial types (M/NM trials and inversion trials) to the  
22 participants. The testing phase of the task had approximately equal match and non-match trials  
23 to avoid response bias. The testing phase also had an approximately equal number of trials for  
24 each greeble image, and its corresponding name had approximately equal probability of being  
25 voiced, to control for stimulus familiarity.

## 1 *Causal Strength and Transitional Probability*

2 We quantified the relationship between a sound (name) and its paired image (greeble) using the  
3 strength of causal induction: given a candidate cause  $C$  (sound) how likely is the effect  $E$  (i.e.,  
4 how likely is it followed by its paired image). We will represent variables  $C$  and  $E$  with upper  
5 case letters, and their instantiations with lower case letters. Hence,  $C = c + / E = e +$   
6 indicates that the cause/effect is present, and  $C = c - / E = e -$  indicates that the cause/effect  
7 is absent (for brevity, we will shorten variables equal to outcomes, such as  $C = c +$  or  $C = c -$   
8 as simply  $c +$  or  $c -$ , respectively). The evidence for a relationship can be encoded as a 2 X 2  
9 contingency table for each sound, as in Table S1 (black letters), where  $N(c+, e+)$  represents the  
10 number of trials in which the effect occurs in the presence of the cause,  $N(c-, e+)$  represents  
11 the number of trials in which the effect occurs in the absence of the cause and so on. Applied to  
12 our study, e.g.,  $C$  could be hearing sound A1, and  $E$  viewing the paired greeble V1. For this  
13 case,  $N(c+, e+)$  would be the number of trials V1 follows A1; whereas  $N(c-, e+)$  would be the  
14 number of trials V1 follows A2 or A3. The full contingency table for the “Highly Predictive”  
15 auditory cue A1 and its paired greeble V1 is shown in Table S1 (in green letters). There are  
16 analogous contingency tables for the other two auditory cues and their paired greebles.

17 Based on these contingency tables, we calculated three different measures of causal  
18 relationship ( $\Delta P$ , causal power and causal support) for each trial.  $\Delta P$  and causal power assume  
19 that  $C$  causes  $E$ .  $\Delta P$  reflects how the probability of  $E$  changes as a consequence of the  
20 occurrence of the cause  $C$ . Causal power corresponds to the probability that an effect  $E$   
21 happened because of cause  $C$  in the absence of all other causes. Whereas causal support  
22 evaluates whether or not a causal relationship actually exists and calculates the strength of that  
23 relationship. To do this, causal support estimates the evidence for a graphical model with a link  
24 between  $C$  and  $E$  against one without a link. For example, let us consider the graphs denoted by  
25 Graph 0 and Graph 1 in Fig S1D (adapted from [33]). There are three variables in each graph:

1 cause  $C$ , effect  $E$  and background cause  $B$ . In Graph 0,  $B$  causes  $E$ , but  $C$  has no relationship  
2 to either  $B$  or  $E$ . In Graph 1, both  $B$  and  $C$  cause  $E$ . While calculating  $\Delta P$  and causal power  
3 Graph 1 is assumed, whereas causal support compares the structure of Graph 1 to that of  
4 Graph 0. Causal support is defined as the evidence provided from data  $D$  in favor of Graph 1,  
5  $P(D | \text{Graph 1})$ , over Graph 0,  $P(D | \text{Graph 0})$ , which can be calculated by the following  
6 equation:

$$7 \text{ Causal support} = \log \frac{P(D|\text{Graph 1})}{P(D|\text{Graph 0})} \quad (1)$$

8 We calculated causal support using freely available Matlab code from [33].  $\Delta P$  and causal  
9 power were calculated using the following formulas:

$$10 \Delta P = \frac{N(c+,e+)}{N(c+,e+) + N(c+,e-)} - \frac{N(c-,e+)}{N(c-,e+) + N(c-,e-)} = P(e+ | c+) - P(e+ | c-) \quad (2)$$

$$11 \text{ Causal power} = \frac{\Delta P}{1 - P(e+ | c-)} \quad (3)$$

12 We compared these three measures of causal relationship with the transitional probability (i.e.,  
13 a comparison between causation and correlation). We calculated the transitional probability of  
14 each greeble ( $V$ ) given prior presentation of its paired sound ( $A$ ), using the equation below:

$$15 \text{ Transitional probability} = \frac{N(c+,e+)}{N(c+)} \quad (4)$$

16 For each subject, we used the causal relationship value of each condition (HP, MP and NP) at  
17 the end of a testing phase as the starting values of the next testing phase. For example, the  
18 starting values of causal relationship for the “under drug” testing phase were equal to the causal  
19 relationship values at the end of the “pre/baseline” testing phase. Similarly, the starting values  
20 for the “after recovery” testing phase were equal to the causal relationship values at the end of  
21 the “under drug” phase (Fig S2A and B). We tested if subjects (i) regained access to already



1 learned and stored predictive information, after they recovered from ketamine dosing, or (ii) re-  
2 learned the predictive information. We mimicked hypothesis (ii) by forcing the starting values of  
3 causal relationship (causal power here) “after recovery” to be zero (Fig S2C) instead of starting  
4 values equal to the causal relationship at the end of the “under drug” phase (hypothesis (i); Fig  
5 S2B).

## 6 *Pharmacology Experiments*

7 To manipulate participants’ predictions, we administered two drugs, ketamine and  
8 dexmedetomidine, each on a separate day, with at least one month intervening. The fixed order  
9 of dexmedetomidine in the first session, and ketamine in the second session, for the first 12  
10 ketamine subjects was IRB-imposed in their consideration of safety profiles of the different  
11 medications (registered on NCT03284307); whereas the final three ketamine subjects were not  
12 administered dexmedetomidine in a prior session. All subjects were healthy and aged between  
13 18-40 years old without contraindication to study drugs. We also acquired EEG data throughout  
14 pharmacology experiments (see section “EEG Recording” below), to measure  
15 electrophysiological activity during predictive coding. A typical pharmacology experiment  
16 consisted of three segments: (a) pre-drug baseline, (b) under drug influence (dexmedetomidine  
17 or ketamine), and (c) after recovery. During the pre-drug baseline, participants performed the  
18 learning phase (200 trials), then the first testing phase (400 trials). Under drug influence,  
19 participants performed the second testing phase (200 trials). Under ketamine, participants also  
20 performed a third testing phase (200 trials; see ketamine dosing for details). After recovery, they  
21 performed the last testing phase (400 trials). As a drug control, we tested three participants  
22 during saline administration. The saline results were similar to the pre-drug baseline. Due to a  
23 protocol-limited maximum time under drug influence, and the need to acquire sufficient M/NM  
24 trials for EEG analyses, the pharmacology experiments did not include inversion trials. All other  
25 aspects of the task in pharmacology experiments were the same as that in psychophysics

1 experiments. For each of the two pharmacology experiments involving a particular participant,  
2 we used three new greeble name and image pairs to rule out any possible contribution of long-  
3 term memory.

#### 4 *Dexmedetomidine Dosing*

5 We intravenously administered a 0.5 mcg/kg bolus over 10 minutes, followed by 0.5 mcg/kg/h  
6 infusion (MedFusion4000 pump at mcg/kg/hr). Participants performed the testing phase (under  
7 drug influence) during this infusion time, corresponding to stable drug levels according to the  
8 pharmacokinetic model for dexmedetomidine by Hannivoort et al. [83]. We targeted a plasma  
9 concentration of dexmedetomidine that is associated with mild sedation (modified observer's  
10 assessment of alertness/sedation (OAA/S) of 4 [84]) to control for non-specific sedative effects,  
11 including hyperpolarization-activated cyclic nucleotide channel (HCN-1) effects [85]. The actual  
12 sedation achieved was on average slightly deeper than anticipated (modified OAA/S median 3,  
13 IQR 2) with a mean plasma concentration of 0.8 (SD 0.33) ng/ml [84].

#### 14 *Ketamine Dosing*

15 In initial experiments, we tested two doses of ketamine to target the lowest plasma  
16 concentration that would modulate NMDARs in the relevant concentration range (<1microMolar  
17 [86]). The first dose corresponded to intravenously administered 0.25 mg/kg ketamine over 10  
18 minutes, followed by 30 mg/h infusion, corresponding to 0.4 microMolar (Rugloop  
19 software using a Harvard 22 pump). Prior to testing subjects, lack of nystagmus and visual  
20 disturbance was confirmed in all participants. Participants performed the testing phase (under  
21 drug influence) during this infusion time, corresponding to stable drug levels according to the  
22 pharmacokinetic model for ketamine by Domino et al. [87,88]. A second dose was tested with a  
23 second bolus of 0.25 mg/kg ketamine over 10 minutes, followed again by 30 mg/h infusion.  
24 Testing again was completed once stable plasma concentrations of approximately 0.8

1 microMolar were achieved. Ketamine blocked predictions at this second level of ketamine  
2 dosing, equating to a minimum plasma concentration of 0.2  $\mu\text{g/ml}$ ; range tested: 0.2-0.3  $\mu\text{g/ml}$ .  
3 As we found the effective ketamine dose to be 0.2  $\mu\text{g/ml}$  in our first seven subjects, we targeted  
4 that plasma concentration for our remaining subjects. We report data for the 0.2  $\mu\text{g/ml}$  dosing in  
5 the manuscript. Three subjects were excluded from “after recovery” testing due to vomiting.

### 6 *Monitoring*

7 Subjects were monitored during drug exposure according to the American Society of  
8 Anesthesiologists guidelines, including electrocardiogram, blood pressure and oxygen  
9 saturation. We monitored arousal level using the modified OAA/S scale [89].

### 10 *EEG Recording*

11 We performed high-density EEG recordings using a 256 channel system (including NA 300  
12 amplifier; Electrical Geodesics, Inc., Eugene, OR). After applying the EEG cap with conductive  
13 gel (ECI Electro-Gel), we adjusted electrodes so that the impedance of each electrode was  
14 within 0-50 kilohms. We checked electrode impedance before the experiment started, and  
15 again before drug administration. Using Net Station, we sampled EEG signals at 250 Hz and,  
16 off-line, bandpass filtered between 0.1 Hz and 45 Hz.

### 17 *EEG Preprocessing*

18 We combined pre-drug baseline data from both ketamine and dexmedetomidine experiments  
19 (baseline RT data showed similar results for both drugs) but “under drug” analyses were  
20 performed separately for each drug. We performed offline preprocessing and analysis using  
21 EEGLAB [90]. First, we extracted data epochs -1,500 ms to 3,000 ms relative to the onset of the  
22 sound and -3000 ms to 800 ms relative to the onset of the image, for each trial. We then visually  
23 inspected each epoch and excluded noisy trials (around 5% of the total trials). Next, we

1 performed Independent Component Analysis (ICA) using built-in functions of EEGLAB  
2 (`pop_runica.m`) and removed noisy components through visual inspection. We excluded three  
3 dexmedetomidine subjects from further analysis— due to very noisy EEG data, which after  
4 cleaning left too few trials for analysis (conditions with <10 trials). Finally, we performed channel  
5 interpolation (EEGLAB function, `eeg_interp.m`, spherical interpolation) and re-referenced to the  
6 average reference.

### 7 *Time-Frequency Decomposition*

8 To investigate changes in EEG spectral content, we performed time-frequency decompositions  
9 of the preprocessed data in sliding windows of 550 ms using Morlet wavelets, whose frequency  
10 ranged from 5 Hz to 45 Hz in 40 linearly spaced steps. Power for each time-frequency point is  
11 the absolute value of the resulting complex signal. We dB normalized power (dB power =  
12  $10 \cdot \log_{10}[\text{power}/\text{baseline}]$ ) to the pre-stimulus baseline, starting 700 ms before sound onset (i.e.,  
13 baseline calculated using sliding 550 ms-long wavelets, starting with the wavelet positioned  
14 from 700-150 ms before sound onset (centered on 425 ms before sound onset) and avoiding  
15 the sound-evoked response). For drift-diffusion model analysis, we calculated power spectral  
16 density and performed divisive baseline correction for each trial.

### 17 *Electrode Selection*

18 We used a data-driven approach, orthogonal to the effect of interest, to select the electrodes of  
19 interest based on the task EEG data. In the first step, we averaged power across all electrodes  
20 (aligned to image onset) and all sounds/greeble names. This revealed increased alpha power  
21 (8-14 Hz) during the delay period compared to baseline (Fig S3B). In the second step, we  
22 selected the electrode clusters that showed significant change in alpha power during the -925  
23 ms to -275 ms time window pre-image onset, compared to baseline. This time window ensured  
24 that our delay period did not overlap with the sound or image. After cluster-based multiple

1 comparisons correction (6), four different clusters showed significant modulation in alpha power  
2 during the delay period [and we selected one electrode (and its four nearest neighbors) in each  
3 cluster that showed the greatest modulation, for consistency across clusters; Fig 3A]: (i) right  
4 frontal (RF electrodes 4, 214, 215, 223, 224); (ii) left central (LC electrodes 65, 66, 71, 76, 77);  
5 (iii) right central (RC electrodes 163, 164, 173, 181, 182); and (iv) occipital (OC electrodes 117,  
6 118, 119, 127, 129). Additionally, we found that only alpha power at the RF cluster significantly  
7 correlated with the predictive value of sounds.

### 8 *Alpha Power Calculation*

9 For each condition, HP, MP and NP, we averaged alpha power over all five electrodes in a  
10 cluster, to calculate the average alpha power of each cluster. To best capture the delay period  
11 activity just prior to image onset, we calculated mean alpha power between -625 to -275ms (as  
12 the wavelet window is centered around each time point, the power estimate before -625 ms and  
13 after -275 ms may contain auditory and visual stimulus-related responses, respectively) for each  
14 trial aligned to image onset. We also calculated mean delay period alpha power between 600 to  
15 1,225 ms for each trial aligned to sound onset. To link EEG power spectral density to behavior  
16 using our drift-diffusion model analysis (see section HDDM), we calculated single-trial baseline-  
17 corrected (divisive normalization) alpha band power, aligned to image onset.

### 18 *Source Space Analysis*

19 We used FieldTrip's beamforming technique to localize sources of the sensor level alpha activity  
20 [36]. This technique uses an adaptive spatial filter to estimate activity at a given location in the  
21 brain. We used a source model defined in MNI space for all subjects. Across all sound cues, we  
22 used the Dynamic Imaging of Coherent Sources (DICS) [91] algorithm to beamform the delay  
23 period alpha activity (window 0-900 ms before image onset). We then calculated the average  
24 source power for each region of interest (ROI) of the AAL atlas [92]. We selected ROIs that

1 showed significant change in source power during the delay period (prior to image onset)  
2 compared to baseline ( $P < 0.025$ , Bonferroni corrected across all cortical AAL ROIs).

### 3 *Granger Causality*

4 We performed non-parametric spectral Granger causality analyses at the source level. Because  
5 there were no significant frontal ROIs in the left hemisphere, we restricted our analyses to the  
6 right hemisphere only. We used a covariance window of 0-900 ms prior to image onset and the  
7 Linearly Constrained Minimum Variance (LCMV) algorithm [93] to generate virtual time series  
8 for significant frontal and temporal ROIs. We averaged across the significant frontal ROIs  
9 (Superior Frontal Gyrus, medial; Superior Frontal Gyrus, dorsolateral; Middle Frontal Gyrus);  
10 and there was only one significant temporal lobe ROI (Inferior Temporal Gyrus). We calculated  
11 non-parametric spectral granger causality between the (average) frontal and temporal ROIs  
12 using the `ft_connectivityanalysis` function in FieldTrip for the stable window starting 900 ms prior  
13 to image onset [94,95]. We found granger causal influence from right frontal to temporal cortex  
14 correlated with the predictive value of sounds only in the beta frequency (15-30 Hz) band.

15

### 16 *Hierarchical Drift-Diffusion Model (HDDM)*

17 We used a drift-diffusion model (DDM) [96], where there are two possible choices  
18 (correct/incorrect responses of the match trials) in our predictive coding task. According to this  
19 model, decision-making involves the accumulation of evidence (drift process) from a starting  
20 point to one of two (upper or lower) thresholds, representing the choices. The accumulation rate  
21 is known as the drift rate,  $v$ ; and the starting point can be biased towards one of the choices (in  
22 our study, by the predictive value of the sound), reflected in a bias parameter,  $z$ . We used  
23 HDDM software ([http://ski.clps.brown.edu/hddm\\_docs/](http://ski.clps.brown.edu/hddm_docs/)) [29] for hierarchical Bayesian estimation  
24 of the parameters of the drift-diffusion model. Particularly with fewer trials per condition, this

1 method has been shown to provide more reliable estimates of parameters and is less  
2 susceptible to outliers [96] than more traditional approaches to DDMs [97,98] .

3 To directly link the causal relationship between the sound and its paired greeble image to  
4 behavior and drift-diffusion parameters, we included the estimates of causal relationship and  
5 transitional probability as predictor variables of the bias,  $z$ , of the model. That is, we estimated  
6 posterior probability densities not only for basic model parameters, but also the degree to which  
7 these parameters are altered by variations in the psychophysical measures ( $\Delta P$ , causal power,  
8 causal support and transitional probability). In these regressions, the bias parameter is given by,  
9  $z(t) = \beta_0 + \beta_1 CP(t)$ , where CP is either  $\Delta P$ , causal power, causal support or transitional  
10 probability,  $\beta_0$  is the intercept, and  $t$  is the trial number. Here, the slope,  $\beta_1$ , is weighted by the  
11 value of the psychophysical measure on that trial. The regression across trials allows us to infer  
12 how the bias changes depending on the psychophysical measure. For example, if these  
13 psychophysical measures are positively correlated to bias, then increased causal strength or  
14 transitional probability will yield faster RTs. We fit four different versions of the model: (i)  $\Delta P$   
15 Model, where bias was estimated from the  $\Delta P$  and updated after each trial; (ii) Causal Power  
16 Model, where bias was estimated from the causal power and updated after each trial; (iii)  
17 Causal Support Model, where bias was estimated from the causal support and updated after  
18 each trial; and (iv) Transitional Probability Model, where bias was estimated from the transitional  
19 probability and updated after each trial. We also modeled our data where drift rate varied  
20 according to causal strength or transitional probability. We used the Deviance Information  
21 Criterion (DIC) for model comparison [99]. The DIC is a measure of model fit (i.e., lack thereof)  
22 with a penalty for complexity (i.e., the number of parameters used to fit the model to the data)  
23 [100]. Models with lower DIC are better models. Models where bias was manipulated instead of  
24 drift rate had significantly lower DIC. For the rest of our analyses, we used models where bias

1 varied with causal strength or transitional probability and drift rate was kept constant at the  
2 default values, as this yielded the lowest DIC.

3 We used Markov Chain Monte Carlo chains with 20,000 samples and 5000 burn-in samples for  
4 estimating the posterior distributions of the model parameters. We assessed chain convergence  
5 by visually inspecting the autocorrelation distribution, as well as by using the Gelman-Rubin  
6 statistic, which compares between-chain and within-chain variance. This statistic was near 1.0  
7 for the parameters, indicating that our sampling was sufficient for proper convergence. We  
8 analyzed parameters of the best model (model with lowest DIC) using Bayesian hypothesis  
9 testing, where the percentage of samples drawn from the posterior fall within a certain region  
10 (e.g.,  $> 0$ ). Posterior probabilities  $\geq 95\%$  were considered significant. Please note that this value  
11 is not equivalent to p-values estimated by frequentist methods, but they can be coarsely  
12 interpreted in a similar manner.

13 All the model comparisons were estimated on the psychophysics data as these had the greatest  
14 number of trials per condition. This ensures robust estimation of the best model. The best-fitting  
15 model was then used to analyze data from different conditions: pre-drug baseline, under  
16 dexmedetomidine, under ketamine and recovery from ketamine. To directly link EEG power  
17 spectral density to behavior and drift-diffusion parameters, we used the HDDM, but now  
18 included the right frontal cluster power estimate (aligned to image onset) in the alpha band as  
19 the predictor variable of the bias,  $z$ , of the model; i.e., in the regression equation above, CP was  
20 now alpha power.

## 21 *Event-related Potentials*

22 We used ERPLAB (<https://erplab.org/erplab>) [101] to run event-related potential (ERP)  
23 analysis. First, we cleaned epoched data aligned to the sound onset for auditory ERPs using the  
24 `pop_artmwppth.m` function of ERPLAB with a moving window of 200 ms (2-3% of trials for each



1 subject were excluded). We then averaged over trials to generate an average ERP for each  
2 subject. We used 200 to 0 ms prior to stimulus onset as baseline. Based on previous  
3 literature[102,103], we chose channel 9 (Cz electrode) for exemplar auditory ERPs in figures.

#### 4 *EEG Signal Decoding*

5 We used two different machine learning approaches in this study: (i) a Support Vector Machine  
6 (SVM) model to classify HP, MP and NP trials after sound onset, with EEG power spectral  
7 density as input; and (ii) a recurrent neural network (RNN) to classify V1, V2 and V3 trials  
8 relative to image onset, with “raw” EEG time series data as input.

9 We used the power spectral density of EEG signals across four frequency bands, theta (5-7  
10 Hz), alpha (8-14Hz), beta (15-30 Hz) and gamma (31-40 Hz), for the first decoding analysis. We  
11 calculated the sum of squared absolute power in each frequency band for each electrode  
12 cluster (RF, LC, RC and OC), thus generating 16 features for each trial as the input dataset.  
13 Using Scikit-learn [104] implemented in Python, for each 20 ms time bin, we trained a SVM  
14 model to classify the EEG data into three classes: highly predictive (HP), moderately predictive  
15 (MP) and not-match predictive (NP). We denote  $y_i(t) \in \{0,1,2\}$  as the identifier of the condition  
16 at time bin  $t$ , where 0, 1, and 2 denotes HP, MP and NP respectively. The SVM classifier is  
17 implemented by a nonlinear projection of the training data  $\mathbf{x}(t)$  feature space  $\mathcal{X}$  into a high  
18 dimensional feature space  $\mathcal{F}$  using a kernel function  $\phi$ . So with  $\phi: \mathcal{X} \rightarrow \mathcal{F}$  being the mapping  
19 kernel, the weight vector  $\mathbf{w}$  can be expressed as a linear combination of the training trials and  
20 the kernel trick can be used to express the discriminant function as

$$21 \quad y(\mathbf{x}(t); \zeta(t)) = \mathbf{a}^T(t) \phi_{\mathbf{x}}(t) + b(t) = \sum_{n=1}^N a_n(t) \phi(\mathbf{x}_n(t), \mathbf{x}(t)) + b(t) \quad (5)$$

22 where  $\zeta(t) = \{\mathbf{a}(t), b(t)\}$  is the new parameter at time bin  $t$  with  $\mathbf{a}(t)$  and  $b(t)$  as weights and  
23 biases of the mapped features space  $\mathcal{F}$ . We used the radial basis function (RBF) kernel that

1 allows nonlinear decision boundary implementation in the input space. The RBF kernel holds  
2 the elements

$$3 \quad \varphi(\mathbf{x}_n(t), \mathbf{x}(t)) = \exp(-\eta(t)\|\mathbf{x}_n(t) - \mathbf{x}(t)\|^2) \quad (6)$$

4 where  $\eta(t)$  is a tunable parameter at each time bin. Model hyperparameters consisting of  
5 regularization penalty ( $C(t)$ ) and  $\eta(t)$  were selected by grid search through 10-fold cross  
6 validation. F-score at each time bin and for each label was calculated as

$$7 \quad F - Score = 2 \times \frac{Precision \times Recall}{Precision + Recall} \quad (7)$$

8 where

$$9 \quad Precision = \frac{True\ Positive}{True\ Positive + False\ Positive} \quad (8)$$

$$10 \quad Recall = \frac{True\ Positive}{True\ Positive + False\ Negative} \quad (9)$$

11

12 As we penalized the mapped weights of the classifier at each time bin, we used normalized  
13 absolute values of the weights as a measure to deduce each feature's contribution to classify  
14 the outputs.

15 Second, we used a RNN with many-to-many architecture to decode visual stimuli using the EEG  
16 time domain signals from the four clusters of electrodes (RF, RC, LC, OC) mentioned above (20  
17 features in total) in successive 20 ms time bins. The proposed RNN consists of a Bidirectional  
18 long-short term memory (BiLSTM) layer followed by an attention layer, a fully connected with  
19 dropout layer and a softmax layer as output. Considering  $\mathbf{x}(t)$  as the input at time  $t$ , the output of  
20 the BiLSTM forward path is calculated as follow:

$$1 \quad \mathbf{i}_{(t)} = \sigma(\mathbf{W}_{xi}^T \cdot \mathbf{x}_{(t)} + \mathbf{W}_{hi}^T \cdot \mathbf{h}_{(t-1)} + \mathbf{b}_i) \quad (10)$$

$$2 \quad \mathbf{f}_{(t)} = \sigma(\mathbf{W}_{xf}^T \cdot \mathbf{x}_{(t)} + \mathbf{W}_{hf}^T \cdot \tilde{\mathbf{h}}_{(t-1)} + \mathbf{b}_f) \quad (11)$$

$$3 \quad \mathbf{o}_{(t)} = \sigma(\mathbf{W}_{xo}^T \cdot \mathbf{x}_{(t)} + \mathbf{W}_{ho}^T \cdot \tilde{\mathbf{h}}_{(t-1)} + \mathbf{b}_o) \quad (12)$$

$$4 \quad \mathbf{g}_{(t)} = \tanh(\mathbf{W}_{xg}^T \cdot \mathbf{x}_{(t)} + \mathbf{W}_{hg}^T \cdot \tilde{\mathbf{h}}_{(t-1)} + \mathbf{b}_g) \quad (13)$$

$$5 \quad \mathbf{c}_{(t)} = \mathbf{f}_{(t)} \otimes \mathbf{c}_{(t-1)} + \mathbf{i}_{(t)} \otimes \mathbf{g}_{(t)} \quad (14)$$

$$6 \quad \tilde{\mathbf{h}}_{(t)} = \mathbf{o}_{(t)} \otimes \tanh(\mathbf{c}_{(t)}) \quad (15)$$

7 Where  $\mathbf{i}_{(t)}$ ,  $\mathbf{f}_{(t)}$ ,  $\mathbf{c}_{(t)}$ ,  $\mathbf{o}_{(t)}$  are the input gate, forget gate, cell gate and output gate respectively,

$$8 \quad \sigma(x) = \frac{1}{1+e^{-x}} \text{ and } \tanh(x) = \frac{e^x - e^{-x}}{e^x + e^{-x}},$$

9 and the output of the backward path is  $\tilde{\mathbf{h}}_{(t)}$ . The attention layer output can be calculated as

10 follows:

$$11 \quad \mathbf{u}_{(t)} = \tanh(\mathbf{W}_s \cdot [\tilde{\mathbf{h}}_{(t)}; \tilde{\mathbf{h}}_{(t)}] + \mathbf{b}_s) \quad (16)$$

$$12 \quad \alpha_{(t)} = \frac{\exp(\mathbf{u}_{(t)}^T \mathbf{u}_w)}{\sum_t \exp(\mathbf{u}_{(t)}^T \mathbf{u}_w)} \quad (17)$$

$$13 \quad \mathbf{s}_{(t)} = \sum_{t' \leq t} \alpha_{(t')} [\tilde{\mathbf{h}}_{(t')}; \tilde{\mathbf{h}}_{(t')}] \quad (18)$$

14 the output of the attention layer was fed to a fully connected layer with dropout followed by a

15 softmax layer which results in class conditional probability as equation (19) specifies.

$$16 \quad \hat{\mathbf{y}}_{(t)} = \text{softmax}(\mathbf{W}_{FC} \cdot \mathbf{s}_{(t)} + \mathbf{b}_{FC}) \quad (19)$$

1 All BiLSTM, attention and FC layers weights and biases will be updated through  
2 backpropagation in time. Hyperparameters of the model including the number of hidden units for  
3 BiLSTM, Attention and FC layers, learning rate, dropout probability, learning rate of stochastic  
4 gradient descent, etc., are optimized via a grid search. The decoding accuracy is calculated with  
5 10-fold cross validation with 60% of trials as training set and 40% as test set by shuffling and  
6 stratifying to avoid accuracy bias due to imbalance classes.

7 To find out how well the model can be generalized in time, we tested the trained model until  
8 time  $t$  with the data at all time points using the stored parameters of the above RNN model. The  
9 results of this analysis is used to see whether information about the visual stimulus can be  
10 decoded prior to stimulus presentation.

11 To gain insight on how well the model decodes each visual stimulus during the delay period, we  
12 trained the model on data at 100 ms post-visual stimulus onset and calculated the F-score for  
13 each class (V1, V2, V3) under all conditions (before drug, under ketamine and DEX).

14 Using the same model (trained on data 100ms after visual stimulus onset), we looked at the  
15 proportion of each auditory stimulus (HP, MP and NP) associated with the correctly decoded  
16 trials at 100 ms before visual stimulus onset.

## 17 **STATISTICAL ANALYSIS**

18  
19  
20 We performed statistical analysis of trials from testing phases and used the learning phase only  
21 to confirm that the participants learned the correct associations. To only include the trials where  
22 the causal power of HP, MP and NP trials have differentiated (Fig 1G), we excluded the first 50  
23 trials of the testing phase in psychophysics experiments and the pre-drug baseline. We used all  
24 available trials for the testing phase of “under drug” and “after recovery”, as the causal power of  
25 HP, MP and NP trials were already differentiated from the beginning (Fig S2A and B). For RT

1 analysis, we excluded RTs more/less than the mean +/- 3SD for each subject, and we used  
2 correct match trials. For delay period EEG analyses, we used both correct match and non-  
3 match trials.

4 Because we had clear, a priori predictions about the effects of the different conditions in this  
5 study, i.e., the effect of prediction and the effects of the drug conditions, we could apply contrast  
6 analysis using linear mixed effects models (LMEs). Our study conformed to the guidelines set  
7 out by Ableson and Prentice [30]; i.e., we included the contrast of interest along with a paired,  
8 orthogonal contrast and infer significance only when our statistical tests showed that effects  
9 were significant for the contrasts of interest and not for the orthogonal contrasts.

10 EEG data were analyzed using contrast analysis with a LME where the predictive value of  
11 sound (HP, MP, NP; varying within subject) and drug condition (before ketamine, under  
12 ketamine, under dexmedetomidine; varying within subject) served as independent variables. For  
13 prediction, we used a linear (-1, 0, 1) contrast as our contrast of interest, and a quadratic (-1, 2,  
14 -1) contrast as the orthogonal contrast in the analysis. For drug condition, we used a quadratic  
15 (-1, 2, -1) contrast as our contrast of interest, and a linear (-1, 0, 1) contrast as the orthogonal  
16 contrast in the analysis. Mathematically, our LME can be written as equation 20 below.

17 
$$DV \sim \beta_0 + \beta_1 * PredictionC_1 + \beta_2 * PredictionC_2 + \beta_3 * DrugC_1 + \beta_4 * DrugC_2$$

18 
$$+ \sum_{i,j=1 \& k=5}^{i,j=2 \& k=8} \beta_k * PredictionC_i * DrugC_j \quad (20)$$

19

20 Here, DV is the dependent variable (RF alpha power or average GC at beta frequency),  
21  $PredictionC_1$  is the contrast of interest modelling sounds' predictive value,  $PredictionC_2$  is the  
22 orthogonal contrast for sounds' predictive value,  $DrugC_1$  is the contrast of interest modelling

1 drug condition,  $DrugC_2$  is the orthogonal contrast for drug condition. Terms after the summation  
2 notation in equation 20 correspond to interactions between sounds' predictive value and drug  
3 condition (all possible interactions, i.e. permutations of contrasts, included).

4 We used a similar LME with prediction (HP, MP, NP; varying within subject) and drug condition  
5 (under ketamine, before drug, under DEX, after recovery; varying within subject) as independent  
6 variables to analyze RT data. We used a linear (HP, MP, NP: -1, 0, 1) contrast as our contrast  
7 of interest to model RT, and a quadratic (HP, MP, NP: -1, 2, -1) contrast as the orthogonal  
8 contrast in the analysis. For drug condition, we used a four-level (under ketamine, before drug,  
9 under DEX, after recovery: 3, -1, -1, -1) contrast as our contrast of interest, and two orthogonal  
10 contrasts (under ketamine, before drug, under DEX, after recovery: 0, 0, -1, -1 and 0, 2, -1, -1)  
11 in the analysis. Both main effects of sounds' predictive value and drug as well as their  
12 interaction were included. We used contrast analysis to model our hypotheses. Mathematically,  
13 our LME can be written as equation 21 below.

$$14 \quad DV \sim \beta_0 + \beta_1 * PredictionC_1 + \beta_2 * PredictionC_2 + \beta_3 * DrugC_1 + \beta_4 * DrugC_2 + \beta_5 * DrugC_3$$
$$15 \quad + \sum_{\substack{i,j=3 \& k=10 \\ i,j=1 \& k=6}} \beta_k * PredictionC_i * DrugC_j \quad (21)$$

16 Here, DV is the dependent variable (RT or accuracy),  $PredictionC_1$  is the contrast of interest  
17 modelling sounds' predictive value,  $PredictionC_2$  is the orthogonal contrast for sounds'  
18 predictive value,  $DrugC_1$  is the contrast of interest modelling drug condition,  $DrugC_2$  and  
19  $DrugC_3$  are the orthogonal contrasts for drug condition. Terms after the summation notation of  
20 equation 21 correspond to interactions between sounds' predictive value and drug condition (all  
21 permutations of two-way interactions included).

22

1 To investigate auditory ERPs, we ran non-parametric permutation tests using the  
2 *ft\_timelockstatistics.m* function from Fieldtrip [36]. For before and during ketamine conditions,  
3 we looked for differences in ERP between sound cues across 50 ms to 300 ms latency from  
4 sound onset. We randomly shuffled condition labels 10,000 times. Alpha value was set to 0.05  
5 for all comparisons.

6 We used repeated measures ANOVA (Holm-Sidak corrected p-values) to test the significance of  
7 F-scores for the three differentially predictive conditions (HP, MP, NP) as well as the  
8 significance of each feature's contribution in output classification.

9 To test the significance of the cross-temporal decoding results, we performed a paired t-test  
10 between the 20-fold cross validated and 100 times resampled accuracy at each pixel and  
11 randomly permuted output labels model at the same pixel. The resulting p-values then were  
12 corrected for multiple comparisons (Holm-Sidak corrections).

13

1 **Acknowledgements:** We thank G. Lupyán, R.A. Pearce and B.R. Postle for useful discussions.  
2 NIH grants R01MH110311 (Y.S.), R01NS117901 (Y.S and R.S.), K23AG055700 (R.S.) and  
3 R01AG063849 (R.S.) supported this work

4

5

6



1 **Supplemental Figures and Table**

2

3 **Fig. S1. Fast RTs to predictive sounds not due to speed-accuracy trade off. Related to Fig**

4 **1.** Population average (25 subjects from psychophysics experiment) (A) RT and (B) accuracy for  
5 highly predictive (HP), moderately predictive (MP), and not-match predictive (NP) sounds. (C)  
6 Posterior probability density of  $\beta_1$  of hierarchical drift diffusion model from psychophysics  
7 experiment. (D) Directed graphs for calculating causal support. In graph 0, B causes E, but C has  
8 no relationship to either B or E. In graph 1, both B and C cause E (adapted from [33]). (E)  
9 Transitional probability (TP) of an exemplar subject across time for pre-ketamine (Pre) testing.  
10 Each data point corresponds to the TP at a particular trial. (F) Causal power (CP) of an exemplar  
11 subject across time for pre-ketamine (Pre) testing. Each data point corresponds to the CP at a  
12 particular trial.

1

2 **Fig S2. Ketamine blocked access to predictive information. Related to Fig 1. (A)**

3 Population causal power values for subjects under ketamine for highly predictive (HP),  
4 moderately predictive (MP), and not-match predictive (NP) sounds. (B) Population causal power  
5 values after recovery when subjects regained access to predictive information. (C) Population  
6 causal power values for hypothetical condition where subjects re-learned predictive information.  
7 (D) Positive  $\beta_1$  of hierarchical drift diffusion model for first 30 trials after recovery from ketamine,  
8 when subjects re-accessed predictive information ( $P\{\beta_{1\alpha}>0\}=0.03$ ). In contrast, the  $\beta_1$  for re-  
9 learning was not greater than zero ( $P\{\beta_{1\alpha}>0\}=0.20$ ).

10

1

2 **Fig S3. Early sensory processing differences cannot account for prediction strength as**

3 **all three sounds generated similar auditory ERPs. Related to Fig 2.** (A) Exemplar auditory

4 ERPs at Cz electrode for highly predictive (HP), moderately predictive (MP) and not-match

5 predictive (NP) sounds. (B) Time-frequency plot of power averaged over all electrodes and all

6 trials. Power calculated in 0.55 s sliding windows, with window at 0 s representing interval -

7 0.275 s to +0.275 s. Plot aligned to image onset. (C) Population average RF alpha power (+SE)

8 during delay period; aligned to sound onset. Time-frequency decomposition of right frontal

9 electrode cluster (RF) before drug administration (Pre) for HP (D), MP (E) and NP (F) sounds.

10 Power calculated in 0.55 s sliding windows, with window at 0 s representing interval -0.275 s to

11 +0.275 s. Plots aligned to sound onset.

12

|                                                             | Effect Present (e <sup>+</sup> )<br><i>Effect Present (V)</i> | Effect Absent (e <sup>-</sup> )<br><i>Effect Absent</i>                 |
|-------------------------------------------------------------|---------------------------------------------------------------|-------------------------------------------------------------------------|
| Cause Present (c <sup>+</sup> )<br><i>Cause Present (A)</i> | N(c <sup>+</sup> ,e <sup>+</sup> )<br><i>A1-V1</i>            | N(c <sup>+</sup> ,e <sup>-</sup> )<br><i>A1-V2, A1-V3</i>               |
| Cause Absent (c <sup>-</sup> )<br><i>Cause Absent</i>       | N(c <sup>-</sup> ,e <sup>+</sup> )<br><i>A2-V1, A3-V1</i>     | N(c <sup>-</sup> ,e <sup>-</sup> )<br><i>A2-V2, A2-V3, A3-V2, A3-V3</i> |

1

2 **Table S1. 2 X 2 contingency table for each sound. Related to Fig 1.** Generic contingency  
3 table for all sounds in black. N(c<sup>+</sup>,e<sup>+</sup>) represents the number of trials in which the effect occurs in  
4 the presence of the cause, N(c<sup>-</sup>,e<sup>+</sup>) represents the number of trials in which the effect occurs in  
5 the absence of the cause, N(c<sup>+</sup>,e<sup>-</sup>) represents the number of trials in which the cause occurs but  
6 not the effect, and N(c<sup>-</sup>,e<sup>-</sup>) represents the number of trials in which the cause and effect are  
7 absent. 'Cause' used in statistical sense. In green, example contingency table for sound A1  
8 where N(c<sup>+</sup>,e<sup>+</sup>) are the number of trials V1 follows A1 (A1-V1); whereas N(c<sup>-</sup>,e<sup>+</sup>) would be the  
9 number of trials V1 follows A2 or A3 (A2-V1 or A3-V1) and so on.

10

## 1 REFERENCES

- 2
- 3 1. Riesenhuber M, Poggio T. Hierarchical models of object recognition in cortex. *Nat Neurosci.* 1999;2: 1019–25. doi:10.1038/14819
- 4
- 5 2. Serre T, Oliva A, Poggio T. A feedforward architecture accounts for rapid categorization. *PNAS.* 2007;104: 6424–6429. doi:10.1073/pnas.0700622104
- 6
- 7 3. Summerfield C, Egner T, Greene M, Koechlin E, Mangels J, Hirsch J. Predictive codes for
- 8 forthcoming perception in the frontal cortex. *Science.* 2006;314: 1311–4.
- 9 doi:10.1126/science.1132028
- 10 4. Körding KP, Wolpert DM. Bayesian integration in sensorimotor learning. *Nature.* 2004;427:
- 11 244–247. doi:10.1038/nature02169
- 12 5. Lange FP de, Heilbron M, Kok P. How Do Expectations Shape Perception? *Trends in*
- 13 *Cognitive Sciences.* 2018;22: 764–779. doi:10.1016/j.tics.2018.06.002
- 14 6. Dayan P, Hinton GE, Neal RM, Zemel RS. The Helmholtz machine. *Neural Comput.* 1995;7:
- 15 889–904.
- 16 7. Spratling MW. A review of predictive coding algorithms. *Brain Cogn.* 2017;112: 92–97.
- 17 doi:10.1016/j.bandc.2015.11.003
- 18 8. Rao RP, Ballard DH. Predictive coding in the visual cortex: a functional interpretation of
- 19 some extra-classical receptive-field effects. *Nat Neurosci.* 1999;2: 79–87. doi:10.1038/4580
- 20 9. Mumford D. On the computational architecture of the neocortex. II. The role of cortico-
- 21 cortical loops. *Biol Cybern.* 1992;66: 241–51. doi:10.1007/bf00198477
- 22 10. Friston K. The free-energy principle: a unified brain theory? *Nat Rev Neurosci.* 2010;11:
- 23 127–38. doi:10.1038/nrn2787
- 24 11. Hobson JA, Friston KJ. Waking and dreaming consciousness: Neurobiological and
- 25 functional considerations. *Progress in Neurobiology.* 2012;98: 82–98.
- 26 doi:10.1016/j.pneurobio.2012.05.003
- 27 12. Seth AK, Suzuki K, Critchley HD. An Interoceptive Predictive Coding Model of Conscious
- 28 Presence. *Front Psychol.* 2012;2. doi:10.3389/fpsyg.2011.00395
- 29 13. Hobson JA, Friston KJ. Consciousness, dreams, and inference: The Cartesian theatre
- 30 revisited. *Journal of Consciousness Studies.* 2014;21: 6–32.
- 31 14. Issa EB, Cadieu CF, DiCarlo JJ. Neural dynamics at successive stages of the ventral visual
- 32 stream are consistent with hierarchical error signals. *Elife.* 2018;7. doi:10.7554/eLife.42870

- 1 15. Gordon N, Koenig-Robert R, Tsuchiya N, van Boxtel JJ, Hohwy J. Neural markers of  
2 predictive coding under perceptual uncertainty revealed with Hierarchical Frequency  
3 Tagging. *Elife*. 2017;6. doi:10.7554/eLife.22749
- 4 16. Egner T, Monti JM, Summerfield C. Expectation and Surprise Determine Neural Population  
5 Responses in the Ventral Visual Stream. *J Neurosci*. 2010;30: 16601–16608.  
6 doi:10.1523/JNEUROSCI.2770-10.2010
- 7 17. Friston K. A theory of cortical responses. *Philos Trans R Soc Lond B Biol Sci*. 2005;360:  
8 815–36. doi:10.1098/rstb.2005.1622
- 9 18. Homayoun H, Moghaddam B. NMDA receptor hypofunction produces opposite effects on  
10 prefrontal cortex interneurons and pyramidal neurons. *J Neurosci*. 2007;27: 11496–500.  
11 doi:10.1523/JNEUROSCI.2213-07.2007
- 12 19. Homayoun H, Moghaddam B. Orbitofrontal cortex neurons as a common target for classic  
13 and glutamatergic antipsychotic drugs. *Proc Natl Acad Sci U S A*. 2008;105: 18041–6.  
14 doi:10.1073/pnas.0806669105
- 15 20. Rosch RE, Auksztulewicz R, Leung PD, Friston KJ, Baldeweg T. Selective Prefrontal  
16 Disinhibition in a Roving Auditory Oddball Paradigm Under N-Methyl-D-Aspartate  
17 Receptor Blockade. *Biol Psychiatry Cogn Neurosci Neuroimaging*. 2019;4: 140–150.  
18 doi:10.1016/j.bpsc.2018.07.003
- 19 21. Murray JD, Anticevic A, Gancsos M, Ichinose M, Corlett PR, Krystal JH, et al. Linking  
20 microcircuit dysfunction to cognitive impairment: effects of disinhibition associated with  
21 schizophrenia in a cortical working memory model. *Cereb Cortex*. 2014;24: 859–72.  
22 doi:10.1093/cercor/bhs370
- 23 22. Rosier AM, Arckens L, Orban GA, Vandesande F. Laminar distribution of NMDA receptors  
24 in cat and monkey visual cortex visualized by [3H]-MK-801 binding. *J Comp Neurol*.  
25 1993;335: 369–80. doi:10.1002/cne.903350307
- 26 23. Self MW, Kooijmans RN, Super H, Lamme VA, Roelfsema PR. Different glutamate  
27 receptors convey feedforward and recurrent processing in macaque V1. *Proc Natl Acad Sci*  
28 *U S A*. 2012;109: 11031–6. doi:10.1073/pnas.1119527109
- 29 24. Zorumski CF, Izumi Y, Mennerick S. Ketamine: NMDA Receptors and Beyond. *J Neurosci*.  
30 2016;36: 11158–11164. doi:10.1523/JNEUROSCI.1547-16.2016
- 31 25. Javitt DC, Steinschneider M, Schroeder CE, Arezzo JC. Role of cortical N-methyl-D-  
32 aspartate receptors in auditory sensory memory and mismatch negativity generation:  
33 implications for schizophrenia. *Proc Natl Acad Sci U S A*. 1996;93: 11962–7.  
34 doi:10.1073/pnas.93.21.11962
- 35 26. Schmidt A, Bachmann R, Kometer M, Csomor PA, Stephan KE, Seifritz E, et al. Mismatch  
36 negativity encoding of prediction errors predicts S-ketamine-induced cognitive  
37 impairments. *Neuropsychopharmacology*. 2012;37: 865–875. doi:10.1038/npp.2011.261

- 1 27. Corlett PR, Honey GD, Fletcher PC. Prediction error, ketamine and psychosis: An updated  
2 model. *J Psychopharmacol.* 2016;30: 1145–1155. doi:10.1177/0269881116650087
- 3 28. Chen X, Shu S, Bayliss DA. HCN1 channel subunits are a molecular substrate for hypnotic  
4 actions of ketamine. *J Neurosci.* 2009;29: 600–609. doi:10.1523/JNEUROSCI.3481-  
5 08.2009
- 6 29. Wiecki TV, Sofer I, Frank MJ. HDDM: Hierarchical Bayesian estimation of the Drift-  
7 Diffusion Model in Python. *Front Neuroinform.* 2013;7: 14. doi:10.3389/fninf.2013.00014
- 8 30. Abelson RP, Prentice DA. Contrast tests of interaction hypothesis. *Psychological Methods.*  
9 1997;2: 315–328. doi:10.1037/1082-989X.2.4.315
- 10 31. Lupyan G, Thompson-Schill SL. The evocative power of words: activation of concepts by  
11 verbal and nonverbal means. *J Exp Psychol Gen.* 2012;141: 170–86. doi:10.1037/a0024904
- 12 32. Khemlani SS, Oppenheimer DM. When one model casts doubt on another: A levels-of-  
13 analysis approach to causal discounting. *Psychological Bulletin.* 2011;137: 195–210.  
14 doi:10.1037/a0021809
- 15 33. Griffiths TL, Tenenbaum JB. Structure and strength in causal induction. *Cogn Psychol.*  
16 2005;51: 334–84. doi:10.1016/j.cogpsych.2005.05.004
- 17 34. Jensen O, Mazaheri A. Shaping functional architecture by oscillatory alpha activity: gating  
18 by inhibition. *Front Hum Neurosci.* 2010;4: 186. doi:10.3389/fnhum.2010.00186
- 19 35. Lange J, Oostenveld R, Fries P. Reduced occipital alpha power indexes enhanced excitability  
20 rather than improved visual perception. *J Neurosci.* 2013;33: 3212–20.  
21 doi:10.1523/JNEUROSCI.3755-12.2013
- 22 36. Oostenveld R, Fries P, Maris E, Schoffelen J-M. FieldTrip: Open Source Software for  
23 Advanced Analysis of MEG, EEG, and Invasive Electrophysiological Data. In:  
24 Computational Intelligence and Neuroscience [Internet]. Hindawi; 23 Dec 2010 [cited 3  
25 Nov 2020] p. e156869. doi:https://doi.org/10.1155/2011/156869
- 26 37. Ma L, Skoblenick K, Seamans JK, Everling S. Ketamine-Induced Changes in the Signal and  
27 Noise of Rule Representation in Working Memory by Lateral Prefrontal Neurons. *J*  
28 *Neurosci.* 2015;35: 11612–11622. doi:10.1523/JNEUROSCI.1839-15.2015
- 29 38. Skoblenick K, Everling S. NMDA antagonist ketamine reduces task selectivity in macaque  
30 dorsolateral prefrontal neurons and impairs performance of randomly interleaved  
31 prosaccades and antisaccades. *J Neurosci.* 2012;32: 12018–12027.  
32 doi:10.1523/JNEUROSCI.1510-12.2012
- 33 39. Kok P, Mostert P, Lange FP de. Prior expectations induce prestimulus sensory templates.  
34 *PNAS.* 2017;114: 10473–10478. doi:10.1073/pnas.1705652114

- 1 40. Blom T, Feuerriegel D, Johnson P, Bode S, Hogendoorn H. Predictions drive neural  
2 representations of visual events ahead of incoming sensory information. *Proc Natl Acad Sci*  
3 *USA*. 2020;117: 7510–7515. doi:10.1073/pnas.1917777117
- 4 41. Gauthier I, Tarr MJ, Anderson AW, Skudlarski P, Gore JC. Activation of the middle  
5 fusiform “face area” increases with expertise in recognizing novel objects. *Nat Neurosci*.  
6 1999;2: 568–573. doi:10.1038/9224
- 7 42. Krusemark EA, Li W. From Early Sensory Specialization to Later Perceptual Generalization:  
8 Dynamic Temporal Progression in Perceiving Individual Threats. *Journal of Neuroscience*.  
9 2013;33: 587–594. doi:10.1523/JNEUROSCI.1379-12.2013
- 10 43. Moulson MC, Balas B, Nelson C, Sinha P. EEG Correlates of Categorical and Graded Face  
11 Perception. *Neuropsychologia*. 2011;49: 3847–3853.  
12 doi:10.1016/j.neuropsychologia.2011.09.046
- 13 44. Rossion B, Kung C-C, Tarr MJ. Visual expertise with nonface objects leads to competition  
14 with the early perceptual processing of faces in the human occipitotemporal cortex. *Proc*  
15 *Natl Acad Sci U S A*. 2004;101: 14521–14526. doi:10.1073/pnas.0405613101
- 16 45. Vlisides PE, Bel-Bahar T, Lee U, Li D, Kim H, Janke E, et al. Neurophysiologic Correlates  
17 of Ketamine Sedation and AnesthesiaA High-density Electroencephalography Study in  
18 Healthy Volunteers. *Anesthes*. 2017;127: 58–69. doi:10.1097/ALN.0000000000001671
- 19 46. Kaas JH, Hackett TA, Tramo MJ. Auditory processing in primate cerebral cortex. *Curr Opin*  
20 *Neurobiol*. 1999;9: 164–170. doi:10.1016/s0959-4388(99)80022-1
- 21 47. Romanski LM, Tian B, Fritz J, Mishkin M, Goldman-Rakic PS, Rauschecker JP. Dual  
22 streams of auditory afferents target multiple domains in the primate prefrontal cortex. *Nat*  
23 *Neurosci*. 1999;2: 1131–1136. doi:10.1038/16056
- 24 48. Kaas JH, Hackett TA. Subdivisions of auditory cortex and processing streams in primates.  
25 *PNAS*. 2000;97: 11793–11799. doi:10.1073/pnas.97.22.11793
- 26 49. Diehl MM, Romanski LM. Responses of prefrontal multisensory neurons to mismatching  
27 faces and vocalizations. *J Neurosci*. 2014;34: 11233–43. doi:10.1523/JNEUROSCI.5168-  
28 13.2014
- 29 50. Hwang J, Romanski LM. Prefrontal neuronal responses during audiovisual mnemonic  
30 processing. *J Neurosci*. 2015;35: 960–71. doi:10.1523/JNEUROSCI.1328-14.2015
- 31 51. Cao Y, Summerfield C, Park H, Giordano BL, Kayser C. Causal Inference in the  
32 Multisensory Brain. *Neuron*. 2019;102: 1076-1087.e8. doi:10.1016/j.neuron.2019.03.043
- 33 52. Kuperberg GR, Jaeger TF. What do we mean by prediction in language comprehension?  
34 *Lang Cogn Neurosci*. 2016;31: 32–59. doi:10.1080/23273798.2015.1102299



- 1 53. Tarr MJ, Gauthier I. FFA: a flexible fusiform area for subordinate-level visual processing  
2 automatized by expertise. *Nat Neurosci.* 2000;3: 764–769. doi:10.1038/77666
- 3 54. Brants M, Wagemans J, Op de Beeck HP. Activation of fusiform face area by Greebles is  
4 related to face similarity but not expertise. *J Cogn Neurosci.* 2011;23: 3949–3958.  
5 doi:10.1162/jocn\_a\_00072
- 6 55. Júnior RDM, Sousa BM, Fukusima S. Hemispheric specialization in face recognition: from  
7 spatial frequencies to holistic/analytic cognitive processing. 2014.  
8 doi:10.3922/J.PSNS.2014.4.09
- 9 56. Tsao DY, Schweers N, Moeller S, Freiwald WA. Patches of face-selective cortex in the  
10 macaque frontal lobe. *Nature Neuroscience.* 2008;11: 877–879. doi:10.1038/nn.2158
- 11 57. Wagner MJ, Kim TH, Savall J, Schnitzer MJ, Luo L. Cerebellar granule cells encode the  
12 expectation of reward. *Nature.* 2017;544: 96–100. doi:10.1038/nature21726
- 13 58. Rescorla RA, Wagner AR. A theory of Pavlovian conditioning: variations in the  
14 effectiveness of reinforcement and nonreinforcement. *A Theory of Pavlovian Conditioning:  
15 Variations in the Effectiveness of Reinforcement and Nonreinforcement.* 1972; 64–99.
- 16 59. Bouton ME. Context and Behavioral Processes in Extinction. *Learn Mem.* 2004;11: 485–  
17 494. doi:10.1101/lm.78804
- 18 60. Holyoak KJ, Cheng PW. Causal Learning and Inference as a Rational Process: The New  
19 Synthesis. *Annual Review of Psychology.* 2011;62: 135–163.  
20 doi:10.1146/annurev.psych.121208.131634
- 21 61. Gershman SJ, Norman KA, Niv Y. Discovering latent causes in reinforcement learning.  
22 *Current Opinion in Behavioral Sciences.* 2015;5: 43–50. doi:10.1016/j.cobeha.2015.07.007
- 23 62. Gershman SJ, Niv Y. Exploring a latent cause theory of classical conditioning. *Learn Behav.*  
24 2012;40: 255–268. doi:10.3758/s13420-012-0080-8
- 25 63. Gershman SJ, Blei DM, Niv Y. Context, learning, and extinction. *Psychol Rev.* 2010;117:  
26 197–209. doi:10.1037/a0017808
- 27 64. Cheng PW. From covariation to causation: A causal power theory. *Psychological Review.*  
28 1997;104: 367–405. doi:10.1037/0033-295X.104.2.367
- 29 65. Lu H, Rojas RR, Beckers T, Yuille A. Sequential Causal Learning in Humans and Rats.  
30 *Proceedings of the Annual Meeting of the Cognitive Science Society.* 2008;30. Available:  
31 <https://escholarship.org/uc/item/3w7509wp>
- 32 66. Jenkinson N, Brown P. New insights into the relationship between dopamine, beta  
33 oscillations and motor function. *Trends Neurosci.* 2011;34: 611–618.  
34 doi:10.1016/j.tins.2011.09.003

- 1 67. Engel AK, Fries P. Beta-band oscillations--signalling the status quo? *Curr Opin Neurobiol.*  
2 2010;20: 156–165. doi:10.1016/j.conb.2010.02.015
- 3 68. Spitzer B, Haegens S. Beyond the Status Quo: A Role for Beta Oscillations in Endogenous  
4 Content (Re)Activation. *eNeuro.* 2017;4. doi:10.1523/ENEURO.0170-17.2017
- 5 69. Klimesch W, Sauseng P, Hanslmayr S. EEG alpha oscillations: the inhibition-timing  
6 hypothesis. *Brain Res Rev.* 2007;53: 63–88. doi:10.1016/j.brainresrev.2006.06.003
- 7 70. Klimesch W. Memory processes, brain oscillations and EEG synchronization. *Int J*  
8 *Psychophysiol.* 1996;24: 61–100. doi:10.1016/s0167-8760(96)00057-8
- 9 71. Whittingstall K, Logothetis NK. Frequency-band coupling in surface EEG reflects spiking  
10 activity in monkey visual cortex. *Neuron.* 2009;64: 281–289.  
11 doi:10.1016/j.neuron.2009.08.016
- 12 72. Buffalo EA, Fries P, Landman R, Buschman TJ, Desimone R. Laminar differences in gamma  
13 and alpha coherence in the ventral stream. *Proc Natl Acad Sci USA.* 2011;108: 11262–  
14 11267. doi:10.1073/pnas.1011284108
- 15 73. van Kerkoerle T, Self MW, Dagnino B, Gariel-Mathis M-A, Poort J, van der Togt C, et al.  
16 Alpha and gamma oscillations characterize feedback and feedforward processing in  
17 monkey visual cortex. *Proc Natl Acad Sci USA.* 2014;111: 14332–14341.  
18 doi:10.1073/pnas.1402773111
- 19 74. Bastos AM, Vezoli J, Bosman CA, Schoffelen J-M, Oostenveld R, Dowdall JR, et al. Visual  
20 areas exert feedforward and feedback influences through distinct frequency channels.  
21 *Neuron.* 2015;85: 390–401. doi:10.1016/j.neuron.2014.12.018
- 22 75. Arnal LH, Giraud A-L. Cortical oscillations and sensory predictions. *Trends in Cognitive*  
23 *Sciences.* 2012;16: 390–398. doi:10.1016/j.tics.2012.05.003
- 24 76. Bastos AM, Lundqvist M, Waite AS, Kopell N, Miller EK. Layer and rhythm specificity for  
25 predictive routing. *PNAS.* 2020 [cited 2 Dec 2020]. doi:10.1073/pnas.2014868117
- 26 77. Han B, VanRullen R. The rhythms of predictive coding? Pre-stimulus phase modulates the  
27 influence of shape perception on luminance judgments. *Scientific Reports.* 2017;7: 43573.  
28 doi:10.1038/srep43573
- 29 78. Klimesch W. Alpha-band oscillations, attention, and controlled access to stored information.  
30 *Trends in Cognitive Sciences.* 2012;16: 606. doi:10.1016/j.tics.2012.10.007
- 31 79. van Pelt S, Heil L, Kwisthout J, Ondobaka S, van Rooij I, Bekkering H. Beta- and gamma-  
32 band activity reflect predictive coding in the processing of causal events. *Social Cognitive*  
33 *and Affective Neuroscience.* 2016;11: 973–980. doi:10.1093/scan/nsw017

- 1 80. Bastos AM, Usrey WM, Adams RA, Mangun GR, Fries P, Friston KJ. Canonical  
2 microcircuits for predictive coding. *Neuron*. 2012;76: 695–711.  
3 doi:10.1016/j.neuron.2012.10.038
- 4 81. Alamia A, VanRullen R. Alpha oscillations and traveling waves: Signatures of predictive  
5 coding? Kohn A, editor. *PLoS Biol*. 2019;17: e3000487. doi:10.1371/journal.pbio.3000487
- 6 82. Saffran JR, Aslin RN, Newport EL. Statistical learning by 8-month-old infants. *Science*.  
7 1996;274: 1926–8.
- 8 83. Hannivoort LN, Eleveld DJ, Proost JH, Reyntjens KMEM, Absalom AR, Vereecke HEM, et  
9 al. Development of an Optimized Pharmacokinetic Model of Dexmedetomidine Using  
10 Target-controlled Infusion in Healthy Volunteers. *Anesthesiology*. 2015;123: 357–367.  
11 doi:10.1097/ALN.0000000000000740
- 12 84. Colin PJ, Hannivoort LN, Eleveld DJ, Reyntjens KMEM, Absalom AR, Vereecke HEM, et  
13 al. Dexmedetomidine pharmacokinetic-pharmacodynamic modelling in healthy volunteers:  
14 1. Influence of arousal on bispectral index and sedation. *Br J Anaesth*. 2017;119: 200–210.  
15 doi:10.1093/bja/aex085
- 16 85. Yang Y, Meng Q, Pan X, Xia Z, Chen X. Dexmedetomidine produced analgesic effect via  
17 inhibition of HCN currents. *Eur J Pharmacol*. 2014;740: 560–564.  
18 doi:10.1016/j.ejphar.2014.06.031
- 19 86. Morris PJ, Moaddel R, Zanos P, Moore CE, Gould T, Zarate CA, et al. Synthesis and N-  
20 Methyl-D-aspartate (NMDA) Receptor Activity of Ketamine Metabolites. *Org Lett*.  
21 2017;19: 4572–4575. doi:10.1021/acs.orglett.7b02177
- 22 87. Domino EF, Domino SE, Smith RE, Domino LE, Goulet JR, Domino KE, et al. Ketamine  
23 kinetics in unmedicated and diazepam-premedicated subjects. *Clin Pharmacol Ther*.  
24 1984;36: 645–653. doi:10.1038/clpt.1984.235
- 25 88. Domino EF, Zsigmond EK, Domino LE, Domino KE, Kothary SP, Domino SE. Plasma  
26 levels of ketamine and two of its metabolites in surgical patients using a gas  
27 chromatographic mass fragmentographic assay. *Anesth Analg*. 1982;61: 87–92.
- 28 89. Chernik DAP, Gillings DP, Laine HP, Hendler JM, Silver JM, Davidson ABP, et al. Validity  
29 and Reliability of the Observer's: Assessment of Alertness/Sedation Scale: Study with:  
30 Intravenous Midazolam. *Journal of Clinical Psychopharmacology*. 1990;10: 244–251.
- 31 90. Delorme A, Makeig S. EEGLAB: an open source toolbox for analysis of single-trial EEG  
32 dynamics including independent component analysis. *J Neurosci Methods*. 2004;134: 9–21.  
33 doi:10.1016/j.jneumeth.2003.10.009
- 34 91. Gross J, Kujala J, Hämäläinen M, Timmermann L, Schnitzler A, Salmelin R. Dynamic  
35 imaging of coherent sources: Studying neural interactions in the human brain. *PNAS*.  
36 2001;98: 694–699. doi:10.1073/pnas.98.2.694

- 1 92. Tzourio-Mazoyer N, Landeau B, Papathanassiou D, Crivello F, Etard O, Delcroix N, et al.  
2 Automated Anatomical Labeling of Activations in SPM Using a Macroscopic Anatomical  
3 Parcellation of the MNI MRI Single-Subject Brain. *NeuroImage*. 2002;15: 273–289.  
4 doi:10.1006/nimg.2001.0978
- 5 93. Van Veen BD, van Drongelen W, Yuchtman M, Suzuki A. Localization of brain electrical  
6 activity via linearly constrained minimum variance spatial filtering. *IEEE Trans Biomed*  
7 *Eng*. 1997;44: 867–880. doi:10.1109/10.623056
- 8 94. Wang X, Chen Y, Ding M. Estimating Granger causality after stimulus onset: A cautionary  
9 note. *NeuroImage*. 2008;41: 767. doi:10.1016/j.neuroimage.2008.03.025
- 10 95. Seth AK, Barrett AB, Barnett L. Granger Causality Analysis in Neuroscience and  
11 Neuroimaging. *J Neurosci*. 2015;35: 3293–3297. doi:10.1523/JNEUROSCI.4399-14.2015
- 12 96. Ratcliff R, McKoon G. The diffusion decision model: theory and data for two-choice  
13 decision tasks. *Neural Comput*. 2008;20: 873–922. doi:10.1162/neco.2008.12-06-420
- 14 97. Voss A, Voss J. A fast numerical algorithm for the estimation of diffusion model parameters.  
15 *Journal of Mathematical Psychology*. 2008;52: 1–9. doi:10.1016/j.jmp.2007.09.005
- 16 98. Vandekerckhove J, Tuerlinckx F. Diffusion model analysis with MATLAB: a DMAT  
17 primer. *Behavior research methods*. 2008;40: 61–72.
- 18 99. Gelman A, Carlin JB, Stern HS, Dunson DB, Vehtari A, Rubin DB, et al. *Bayesian Data*  
19 *Analysis*. Chapman and Hall/CRC; 2013. doi:10.1201/b16018
- 20 100. Spiegelhalter DJ, Best NG, Carlin BP, Linde AVD. Bayesian measures of model  
21 complexity and fit. *Journal of the Royal Statistical Society: Series B (Statistical*  
22 *Methodology)*. 2002;64: 583–639. doi:10.1111/1467-9868.00353
- 23 101. Lopez-Calderon J, Luck SJ. ERPLAB: an open-source toolbox for the analysis of event-  
24 related potentials. *Front Hum Neurosci*. 2014;8. doi:10.3389/fnhum.2014.00213
- 25 102. Davies PL, Chang W-P, Gavin WJ. Middle and late latency ERP components discriminate  
26 between adults, typical children, and children with sensory processing disorders. *Front*  
27 *Integr Neurosci*. 2010;4. doi:10.3389/fnint.2010.00016
- 28 103. Winkler I, Denham S, Escera C. Auditory Event-related Potentials. In: Jaeger D, Jung R,  
29 editors. *Encyclopedia of Computational Neuroscience*. New York, NY: Springer; 2013. pp.  
30 1–29. doi:10.1007/978-1-4614-7320-6\_99-1
- 31 104. Pedregosa F, Varoquaux G, Gramfort A, Michel V, Thirion B, Grisel O, et al. Scikit-learn:  
32 *Machine Learning in Python*. *Journal of Machine Learning Research*. 2011;12: 2825–2830.

33

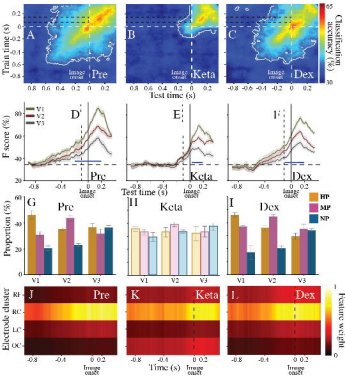

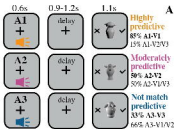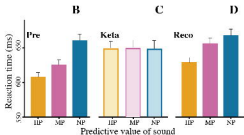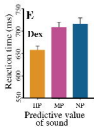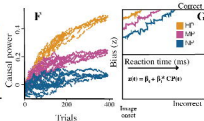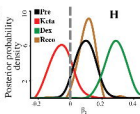

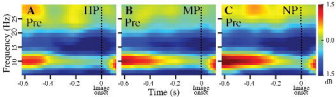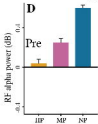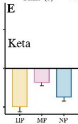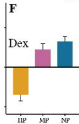

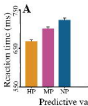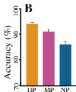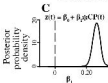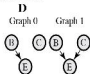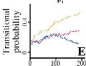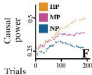



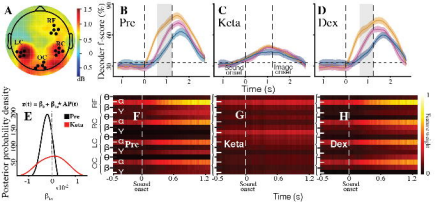

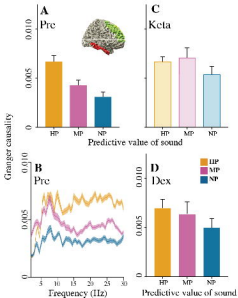

Under Ketamine

**A**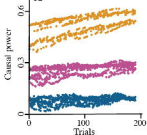

Recovery (re-accessing)

**B**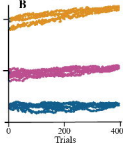

Recovery (re-learning)

**C**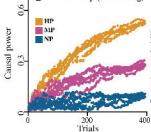**D**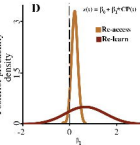

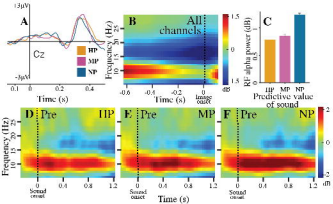

Source: https://www.biorxiv.org/content/biorxiv/early/2021/06/21/2020.01.06.896589.full.pdf
